# Supplementary material for: Parallel Adaptive Divergence among Geographically Diverse Human Populations
Source: PLOS journal article supplement (doi:10.1371/journal.pgen.1002127), 2011-06-16
Supplement: S6 (10.1371/journal.pgen.1002127.s006) [file journal.pgen.1002127.s006]

**Table S3**

Enriched Gene Ontology Biological Process (GO BP) terms and KEGG pathways among parallel divergent SNPs.

| <b>Category<sup>a</sup></b>         | <b>Type</b> | <b>Mean PD SNPs<sup>b</sup></b> | <b>Total PD Genes<sup>c</sup></b> | <b>Enrichment<sup>d</sup></b> |
|-------------------------------------|-------------|---------------------------------|-----------------------------------|-------------------------------|
| Protein folding                     | GO BP       | 3.6                             | 9                                 | 5.06                          |
| Protein heterooligomerization       | GO BP       | 3.5                             | 9                                 | 4.31                          |
| Integrin-mediated signaling pathway | GO BP       | 4.9                             | 15                                | 2.55                          |
| Cholesterol metabolic process       | GO BP       | 3.3                             | 17                                | 2.44                          |
| Positive regulation of axonogenesis | GO BP       | 3.4                             | 8                                 | 2.22                          |
| DNA repair                          | GO BP       | 4.2                             | 14                                | 2.21                          |
| Protein oligomerization             | GO BP       | 6.3                             | 19                                | 2.19                          |
| Epithelial cell differentiation     | GO BP       | 3.3                             | 8                                 | 2.05                          |
| ABC transporters                    | KEGG        | 3.7                             | 6                                 | 3.16                          |
| Chronic myeloid leukemia            | KEGG        | 3.3                             | 7                                 | 2.79                          |
| B cell receptor signaling pathway   | KEGG        | 3.2                             | 8                                 | 2.33                          |
| Prostate cancer                     | KEGG        | 3.6                             | 9                                 | 2.28                          |
| Ubiquitin mediated proteolysis      | KEGG        | 3.7                             | 13                                | 2.25                          |
| Olfactory transduction              | KEGG        | 3.3                             | 7                                 | 2.21                          |
| Neurotrophin signaling pathway      | KEGG        | 4.3                             | 11                                | 2.14                          |
| Gap junction                        | KEGG        | 6.6                             | 12                                | 2.08                          |
| T cell receptor signaling pathway   | KEGG        | 3.8                             | 13                                | 2.05                          |

<sup>a</sup>All categories showing at least 2-fold enrichment and a mean of at least three SNPs per replicate are shown, with redundant terms eliminated. While not significant when corrected for multiple tests, these categories provide an overview of the characteristics of parallel divergent genes. Some categories (e.g. “cholesterol metabolic process”, “B cell receptor signaling pathway”) are consistent with obvious geographically varying selective pressures such as diet and disease, while others are less intuitive.

<sup>b</sup>Mean number of parallel divergent SNPs per replicate that overlap a gene in this category, among all divergence comparisons.

<sup>c</sup>Total number of genes in this category that contain a parallel divergent SNP in at least one replicate.

<sup>d</sup>Ratio of the mean proportion of parallel divergent SNPs in a replicate that overlap a gene in this category to the proportion of all independent SNPs in a replicate that that overlap a gene in this category.
