# Supplementary material for: Parallel Adaptive Divergence among Geographically Diverse Human Populations
Source: PLoS Genet. 2011 Jun 16;7(6):e1002127. doi: 10.1371/journal.pgen.1002127 (PMC3116918; doi:10.1371/journal.pgen.1002127)
Supplement: Table S2 — All sites showing parallel divergence in at least one replicate. (XLS) [file pgen.1002127.s005.xls]

## Sheet: Sheet1
Tennessen and Akey 2011
Table S2
Parallel divergent SNPs observed at 15 divergence comparisons after sampling a set of independent SNPs 1000 times.
“Site” is mapped to hg18.
“Count” refers to the number of times out of 1000 that a site showed parallel divergence at a threshold of 5% or 1%.
Divergence Comparison	rsID	Chromosome	Site	Gene	Count 5%	Count 1%
PY-EU vs. OC-EA	rs878063	1	3462788	MEGF6	70	81
PY-EU vs. OC-EA	rs12076190	1	5751626	na	91	0
PY-EU vs. OC-EA	rs7526892	1	7474042	CAMTA1	99	0
PY-EU vs. OC-EA	rs10927831	1	15900960	PLEKHM2	18	0
PY-EU vs. OC-EA	rs7552400	1	15908479	PLEKHM2	18	0
PY-EU vs. OC-EA	rs12091750	1	15915353	PLEKHM2	49	0
PY-EU vs. OC-EA	rs12091644	1	15917532	PLEKHM2	41	0
PY-EU vs. OC-EA	rs6701500	1	15936285	SLC25A34	115	0
PY-EU vs. OC-EA	rs4649203	1	24392507	na	27	0
PY-EU vs. OC-EA	rs7537203	1	35998535	CLSPN	171	0
PY-EU vs. OC-EA	rs6679121	1	47639737	na	35	0
PY-EU vs. OC-EA	rs11205809	1	51320012	na	31	0
PY-EU vs. OC-EA	rs6664692	1	62968248	na	137	0
PY-EU vs. OC-EA	rs4529740	1	63969629	na	30	0
PY-EU vs. OC-EA	rs2658423	1	63970566	na	54	0
PY-EU vs. OC-EA	rs583192	1	64017940	ROR1	44	0
PY-EU vs. OC-EA	rs592298	1	64060648	ROR1	28	0
PY-EU vs. OC-EA	rs683574	1	64064528	ROR1	51	0
PY-EU vs. OC-EA	rs7528814	1	64374433	ROR1	23	0
PY-EU vs. OC-EA	rs6662607	1	67794090	na	49	0
PY-EU vs. OC-EA	rs11164273	1	101942883	na	216	0
PY-EU vs. OC-EA	rs2793830	1	120267631	NOTCH2	400	0
PY-EU vs. OC-EA	rs1547832	1	149743817	na	305	0
PY-EU vs. OC-EA	rs3126091	1	150573962	na	62	0
PY-EU vs. OC-EA	rs11264359	1	153549453	FDPS	60	0
PY-EU vs. OC-EA	rs1027702	1	159979481	na	4	0
PY-EU vs. OC-EA	rs2017349	1	176686040	RASAL2	147	0
PY-EU vs. OC-EA	rs3842888	1	178395828	QSOX1	263	0
PY-EU vs. OC-EA	rs10911661	1	183229372	na	316	0
PY-EU vs. OC-EA	rs2297901	1	199302230	CACNA1S	20	0
PY-EU vs. OC-EA	rs10900597	1	202789112	na	54	0
PY-EU vs. OC-EA	rs7535216	1	203064083	NFASC	1	0
PY-EU vs. OC-EA	rs12075255	1	205028251	na	22	0
PY-EU vs. OC-EA	rs7521857	1	239341141	RGS7	3	0
PY-EU vs. OC-EA	rs1025542	2	26239353	na	318	0
PY-EU vs. OC-EA	rs1108460	2	38203511	na	15	0
PY-EU vs. OC-EA	rs786412	2	44580143	C2orf34	368	0
PY-EU vs. OC-EA	rs786411	2	44580233	C2orf34	181	0
PY-EU vs. OC-EA	rs4462818	2	69061806	GKN1	123	0
PY-EU vs. OC-EA	rs4267542	2	69084554	na	33	0
PY-EU vs. OC-EA	rs7584385	2	69094763	ANTXR1	34	0
PY-EU vs. OC-EA	rs6546473	2	69113861	ANTXR1	332	0
PY-EU vs. OC-EA	rs4618092	2	69126491	ANTXR1	176	0
PY-EU vs. OC-EA	rs6546476	2	69132272	ANTXR1	55	0
PY-EU vs. OC-EA	rs4315565	2	69141447	ANTXR1	77	0
PY-EU vs. OC-EA	rs363612	2	74764581	na	20	0
PY-EU vs. OC-EA	rs1137	2	74792684	na	23	0
PY-EU vs. OC-EA	rs7603256	2	96931116	na	63	0
PY-EU vs. OC-EA	rs7592101	2	96943234	na	16	0
PY-EU vs. OC-EA	rs7594227	2	96969475	na	16	0
PY-EU vs. OC-EA	rs11896903	2	104081758	na	432	0
PY-EU vs. OC-EA	rs6542725	2	107560455	na	153	0
PY-EU vs. OC-EA	rs1913987	2	107583052	na	194	0
PY-EU vs. OC-EA	rs1516228	2	107640804	na	2	0
PY-EU vs. OC-EA	rs700851	2	107718553	na	73	0
PY-EU vs. OC-EA	rs328025	2	107721477	na	105	0
PY-EU vs. OC-EA	rs328026	2	107746963	na	88	0
PY-EU vs. OC-EA	rs730631	2	108317264	LOC151234	47	0
PY-EU vs. OC-EA	rs10167564	2	108355057	na	37	0
PY-EU vs. OC-EA	rs13390901	2	108391443	na	6	0
PY-EU vs. OC-EA	rs12478500	2	108780535	CCDC138	226	0
PY-EU vs. OC-EA	rs1478515	2	108867361	na	359	0
PY-EU vs. OC-EA	rs1478516	2	108867498	na	350	0
PY-EU vs. OC-EA	rs4663057	2	127362483	LOC339760,LOC651281	23	0
PY-EU vs. OC-EA	rs4662986	2	130186378	na	552	0
PY-EU vs. OC-EA	rs10210687	2	137105967	na	50	0
PY-EU vs. OC-EA	rs352188	2	138070206	THSD7B	32	0
PY-EU vs. OC-EA	rs10931434	2	153589699	na	13	0
PY-EU vs. OC-EA	rs1596638	2	154565034	GALNT13	26	0
PY-EU vs. OC-EA	rs13032587	2	177391650	na	65	0
PY-EU vs. OC-EA	rs4894229	2	177562686	na	589	618
PY-EU vs. OC-EA	rs12105690	2	187539054	na	71	0
PY-EU vs. OC-EA	rs1451554	2	187540249	na	76	0
PY-EU vs. OC-EA	rs12693541	2	190126935	na	111	0
PY-EU vs. OC-EA	rs6434873	2	197213071	FLJ39660	421	0
PY-EU vs. OC-EA	rs2289380	2	197377434	UNQ6411	56	0
PY-EU vs. OC-EA	rs940794	2	217164812	na	41	0
PY-EU vs. OC-EA	rs10192769	2	227408162	RHBDD1	100	0
PY-EU vs. OC-EA	rs1899398	3	3745669	na	74	0
PY-EU vs. OC-EA	rs1899400	3	3745922	na	83	0
PY-EU vs. OC-EA	rs6443206	3	8795075	na	67	0
PY-EU vs. OC-EA	rs888566	3	8800741	na	24	0
PY-EU vs. OC-EA	rs9875468	3	9052896	SRGAP3	24	0
PY-EU vs. OC-EA	rs2276747	3	13624763	FBLN2	44	0
PY-EU vs. OC-EA	rs4596126	3	13634898	FBLN2	11	0
PY-EU vs. OC-EA	rs7623065	3	22360379	na	19	0
PY-EU vs. OC-EA	rs33533	3	42390474	na	572	0
PY-EU vs. OC-EA	rs6787396	3	64301512	na	514	0
PY-EU vs. OC-EA	rs2578320	3	81226955	LOC728290	116	0
PY-EU vs. OC-EA	rs999367	3	114463173	BOC	31	0
PY-EU vs. OC-EA	rs12490319	3	115994046	ZBTB20	213	0
PY-EU vs. OC-EA	rs9834547	3	116027142	ZBTB20	204	0
PY-EU vs. OC-EA	rs6791168	3	116042815	ZBTB20	22	0
PY-EU vs. OC-EA	rs1533931	3	116049399	ZBTB20	1	0
PY-EU vs. OC-EA	rs6768251	3	116295467	ZBTB20	609	0
PY-EU vs. OC-EA	rs2717263	3	120465112	na	90	0
PY-EU vs. OC-EA	rs9827972	3	120483066	na	19	0
PY-EU vs. OC-EA	rs4687993	3	120492820	na	282	0
PY-EU vs. OC-EA	rs7622994	3	120506661	CDGAP	263	0
PY-EU vs. OC-EA	rs6799522	3	124242312	na	27	0
PY-EU vs. OC-EA	rs6791346	3	124245130	na	35	0
PY-EU vs. OC-EA	rs9844835	3	141461790	CLSTN2	55	0
PY-EU vs. OC-EA	rs11915244	3	155734982	na	16	0
PY-EU vs. OC-EA	rs7628695	3	155845922	na	21	26
PY-EU vs. OC-EA	rs16826083	3	157595608	KCNAB1	27	0
PY-EU vs. OC-EA	rs6770585	3	162413565	na	183	0
PY-EU vs. OC-EA	rs7624807	3	169420582	na	72	0
PY-EU vs. OC-EA	rs9874286	3	169425673	na	41	0
PY-EU vs. OC-EA	rs10936625	3	171577602	SKIL	143	0
PY-EU vs. OC-EA	rs9872719	3	177037073	na	294	0
PY-EU vs. OC-EA	rs9869315	3	177037998	na	294	0
PY-EU vs. OC-EA	rs10936872	3	177038117	na	197	0
PY-EU vs. OC-EA	rs7431003	3	199173607	LMLN	47	0
PY-EU vs. OC-EA	rs6605321	3	199184392	LMLN	41	0
PY-EU vs. OC-EA	rs13327370	3	199228595	LMLN	58	0
PY-EU vs. OC-EA	rs6763543	3	199251343	na	38	0
PY-EU vs. OC-EA	rs9884834	4	92571	ZNF718	315	0
PY-EU vs. OC-EA	rs3821936	4	5880158	CRMP1	81	0
PY-EU vs. OC-EA	rs2046359	4	10598106	na	48	0
PY-EU vs. OC-EA	rs2554377	4	13915129	na	240	0
PY-EU vs. OC-EA	rs6831346	4	21690914	na	1	0
PY-EU vs. OC-EA	rs4626188	4	21703278	na	86	0
PY-EU vs. OC-EA	rs6825168	4	32406879	na	19	0
PY-EU vs. OC-EA	rs12648160	4	32412810	na	21	0
PY-EU vs. OC-EA	rs9992839	4	32447798	na	21	0
PY-EU vs. OC-EA	rs6531293	4	32651220	na	19	0
PY-EU vs. OC-EA	rs6531329	4	32711939	na	166	0
PY-EU vs. OC-EA	rs3113584	4	32915308	LOC133185	107	0
PY-EU vs. OC-EA	rs2687466	4	32940629	na	107	0
PY-EU vs. OC-EA	rs2687404	4	32982100	na	84	0
PY-EU vs. OC-EA	rs883617	4	32994477	na	92	43
PY-EU vs. OC-EA	rs2585942	4	33000247	na	101	41
PY-EU vs. OC-EA	rs4293771	4	33037607	na	105	38
PY-EU vs. OC-EA	rs10004371	4	33039662	na	89	26
PY-EU vs. OC-EA	rs982850	4	33046119	na	121	0
PY-EU vs. OC-EA	rs10021710	4	33055138	na	152	0
PY-EU vs. OC-EA	rs7657687	4	33082728	na	292	316
PY-EU vs. OC-EA	rs6827883	4	33120802	na	286	313
PY-EU vs. OC-EA	rs7655557	4	33283774	na	574	606
PY-EU vs. OC-EA	rs218268	4	55105844	na	96	0
PY-EU vs. OC-EA	rs2472649	4	75076572	na	49	0
PY-EU vs. OC-EA	rs4975171	4	80365549	na	491	0
PY-EU vs. OC-EA	rs4975172	4	80365714	na	467	0
PY-EU vs. OC-EA	rs978155	4	102019789	na	163	0
PY-EU vs. OC-EA	rs2866250	4	102035660	na	229	0
PY-EU vs. OC-EA	rs7687283	4	102093061	na	230	0
PY-EU vs. OC-EA	rs2048062	4	117311679	na	849	0
PY-EU vs. OC-EA	rs11724265	4	117332740	na	773	0
PY-EU vs. OC-EA	rs2174667	4	117335998	na	511	0
PY-EU vs. OC-EA	rs1525760	4	117354829	na	768	0
PY-EU vs. OC-EA	rs7657997	4	151735416	LRBA	27	0
PY-EU vs. OC-EA	rs10010950	4	151794289	LRBA	25	0
PY-EU vs. OC-EA	rs4318628	4	151821568	LRBA	82	0
PY-EU vs. OC-EA	rs10520078	4	151860636	LOC729566,LRBA	239	0
PY-EU vs. OC-EA	rs1993109	4	151876039	LRBA	265	0
PY-EU vs. OC-EA	rs11934912	4	151921813	LRBA	229	0
PY-EU vs. OC-EA	rs2407549	4	152009990	LRBA	94	0
PY-EU vs. OC-EA	rs7693278	4	152029075	LRBA	91	0
PY-EU vs. OC-EA	rs2407548	4	152069974	LRBA	77	0
PY-EU vs. OC-EA	rs10857253	4	152224234	na	101	0
PY-EU vs. OC-EA	rs11733964	4	152235154	na	86	0
PY-EU vs. OC-EA	rs12644496	4	152324798	SH3D19	193	0
PY-EU vs. OC-EA	rs2407412	4	152360849	SH3D19	218	0
PY-EU vs. OC-EA	rs1875308	4	152420654	ESSPL	793	0
PY-EU vs. OC-EA	rs7675251	4	185770685	na	505	0
PY-EU vs. OC-EA	rs4076817	5	1187166	na	22	0
PY-EU vs. OC-EA	rs1173201	5	4872918	na	152	0
PY-EU vs. OC-EA	rs1173213	5	4878401	na	35	0
PY-EU vs. OC-EA	rs12652806	5	6526308	FLJ25076	24	0
PY-EU vs. OC-EA	rs10035299	5	10665627	LOC651746	35	0
PY-EU vs. OC-EA	rs2287934	5	36207177	SKP2	627	0
PY-EU vs. OC-EA	rs7712360	5	55815858	na	21	0
PY-EU vs. OC-EA	rs1423626	5	87161050	na	46	0
PY-EU vs. OC-EA	rs11741190	5	87360666	na	2	0
PY-EU vs. OC-EA	rs4458614	5	90476902	GPR98	32	0
PY-EU vs. OC-EA	rs2941876	5	90514045	na	404	419
PY-EU vs. OC-EA	rs2941878	5	90515185	na	36	0
PY-EU vs. OC-EA	rs2941885	5	90541273	na	975	0
PY-EU vs. OC-EA	rs4869280	5	91751401	na	42	0
PY-EU vs. OC-EA	rs6861029	5	91918851	na	41	0
PY-EU vs. OC-EA	rs6890872	5	112426060	MCC	30	0
PY-EU vs. OC-EA	rs153645	5	115892477	SEMA6A	155	0
PY-EU vs. OC-EA	rs6877866	5	121081143	na	57	0
PY-EU vs. OC-EA	rs10900755	5	121533306	LOC728460	125	0
PY-EU vs. OC-EA	rs1427936	5	121534577	LOC728460	129	0
PY-EU vs. OC-EA	rs182844	5	126875628	na	40	0
PY-EU vs. OC-EA	rs3909885	5	126946403	na	15	0
PY-EU vs. OC-EA	rs30523	5	132138942	na	354	0
PY-EU vs. OC-EA	rs261532	5	138929546	UBE2D2	13	0
PY-EU vs. OC-EA	rs165335	5	150858370	na	650	0
PY-EU vs. OC-EA	rs2443023	5	165903916	na	30	0
PY-EU vs. OC-EA	rs10076619	5	173458478	HMP19	32	0
PY-EU vs. OC-EA	rs10948309	6	46859122	na	75	0
PY-EU vs. OC-EA	rs3793035	6	70750883	COL19A1	358	0
PY-EU vs. OC-EA	rs199634	6	72306862	na	576	0
PY-EU vs. OC-EA	rs7758960	6	88952141	na	25	0
PY-EU vs. OC-EA	rs7747006	6	88953547	na	71	0
PY-EU vs. OC-EA	rs9401641	6	123539991	na	42	0
PY-EU vs. OC-EA	rs4292545	6	129311105	LAMA2	240	0
PY-EU vs. OC-EA	rs6569585	6	129516639	LAMA2	245	0
PY-EU vs. OC-EA	rs9492262	6	129547525	LAMA2	109	0
PY-EU vs. OC-EA	rs3778135	6	129549602	LAMA2	151	0
PY-EU vs. OC-EA	rs2876021	6	129550900	LAMA2	144	0
PY-EU vs. OC-EA	rs4507607	6	134451492	na	873	0
PY-EU vs. OC-EA	rs1052502	6	135648258	AHI1	28	0
PY-EU vs. OC-EA	rs7766656	6	135659294	AHI1	22	21
PY-EU vs. OC-EA	rs9494266	6	135893266	na	30	0
PY-EU vs. OC-EA	rs4323318	6	150994877	PLEKHG1	754	0
PY-EU vs. OC-EA	rs10237838	7	4040524	SDK1	502	0
PY-EU vs. OC-EA	rs10242122	7	4092111	SDK1	352	0
PY-EU vs. OC-EA	rs619672	7	4162514	SDK1	919	0
PY-EU vs. OC-EA	rs12532693	7	7555382	na	19	0
PY-EU vs. OC-EA	rs7803888	7	7594941	FLJ20323	20	0
PY-EU vs. OC-EA	rs12534250	7	40481246	C7orf10	240	0
PY-EU vs. OC-EA	rs7789681	7	40507617	C7orf10	230	0
PY-EU vs. OC-EA	rs6964059	7	40630937	C7orf10	276	0
PY-EU vs. OC-EA	rs4718716	7	67294342	na	335	0
PY-EU vs. OC-EA	rs17156564	7	82137725	na	840	0
PY-EU vs. OC-EA	rs9969217	7	98729374	na	526	0
PY-EU vs. OC-EA	rs6955490	7	98812524	ARPC1B	117	114
PY-EU vs. OC-EA	rs2003499	7	98852920	BUD31,PTCD1	120	138
PY-EU vs. OC-EA	rs1404228	7	112838024	na	21	0
PY-EU vs. OC-EA	rs1839115	7	114188108	na	529	0
PY-EU vs. OC-EA	rs1448345	7	114193181	na	234	0
PY-EU vs. OC-EA	rs1530680	7	114194632	na	235	0
PY-EU vs. OC-EA	rs9969206	7	117205690	CTTNBP2	105	100
PY-EU vs. OC-EA	rs7778257	7	119399777	na	167	0
PY-EU vs. OC-EA	rs6963628	7	119428305	na	73	0
PY-EU vs. OC-EA	rs10270624	7	119473254	na	47	0
PY-EU vs. OC-EA	rs7804857	7	119553175	na	79	0
PY-EU vs. OC-EA	rs7792688	7	119615567	na	250	0
PY-EU vs. OC-EA	rs12533932	7	119727006	KCND2	56	0
PY-EU vs. OC-EA	rs2402526	7	119742821	KCND2	56	0
PY-EU vs. OC-EA	rs7810357	7	119812792	KCND2	772	0
PY-EU vs. OC-EA	rs2160010	7	120475699	FLJ21986	16	0
PY-EU vs. OC-EA	rs700316	7	147002743	CNTNAP2	380	0
PY-EU vs. OC-EA	rs2159469	7	157298576	PTPRN2	219	0
PY-EU vs. OC-EA	rs6958049	7	157304122	PTPRN2	204	0
PY-EU vs. OC-EA	rs11136757	8	4447323	CSMD1	603	0
PY-EU vs. OC-EA	rs2515552	8	6453603	MCPH1	51	0
PY-EU vs. OC-EA	rs4841154	8	9352928	na	209	0
PY-EU vs. OC-EA	rs6991853	8	10104567	MSRA	28	0
PY-EU vs. OC-EA	rs7006613	8	17536010	PDGFRL	165	0
PY-EU vs. OC-EA	rs13273637	8	20450477	na	207	0
PY-EU vs. OC-EA	rs13281313	8	20652188	na	59	0
PY-EU vs. OC-EA	rs6982080	8	29686861	na	24	0
PY-EU vs. OC-EA	rs7005808	8	34651643	na	474	493
PY-EU vs. OC-EA	rs11994327	8	34696584	na	316	0
PY-EU vs. OC-EA	rs2685607	8	34755686	na	333	0
PY-EU vs. OC-EA	rs2685593	8	34783010	na	101	0
PY-EU vs. OC-EA	rs2685609	8	34794461	na	92	0
PY-EU vs. OC-EA	rs1317084	8	34796689	na	90	0
PY-EU vs. OC-EA	rs2687543	8	34799762	na	68	0
PY-EU vs. OC-EA	rs7818839	8	38607758	na	56	0
PY-EU vs. OC-EA	rs17676043	8	50948783	na	89	0
PY-EU vs. OC-EA	rs10103335	8	62307546	na	104	0
PY-EU vs. OC-EA	rs6990254	8	62380077	RLBP1L1	81	0
PY-EU vs. OC-EA	rs6989866	8	89442152	na	95	0
PY-EU vs. OC-EA	rs4573324	8	89748729	na	39	0
PY-EU vs. OC-EA	rs6471261	8	91959346	EFCBP1	88	0
PY-EU vs. OC-EA	rs7003041	8	102819567	NCALD	83	0
PY-EU vs. OC-EA	rs6988793	8	102850897	NCALD	158	0
PY-EU vs. OC-EA	rs1264866	8	102928483	na	142	0
PY-EU vs. OC-EA	rs6990312	8	110671493	GOLSYN	48	0
PY-EU vs. OC-EA	rs17840659	8	111488705	na	32	34
PY-EU vs. OC-EA	rs4500059	8	111501581	na	27	0
PY-EU vs. OC-EA	rs7008113	8	111507831	na	23	0
PY-EU vs. OC-EA	rs4552876	8	111517603	na	24	0
PY-EU vs. OC-EA	rs16880715	8	111524781	na	35	0
PY-EU vs. OC-EA	rs4487731	8	111531312	na	448	0
PY-EU vs. OC-EA	rs6469315	8	111670075	na	297	0
PY-EU vs. OC-EA	rs7008570	8	111704941	na	38	0
PY-EU vs. OC-EA	rs7836628	8	139866982	COL22A1	84	0
PY-EU vs. OC-EA	rs6577948	8	139867381	COL22A1	468	0
PY-EU vs. OC-EA	rs2318832	8	140075791	na	210	0
PY-EU vs. OC-EA	rs2665931	8	141046387	NIBP	855	0
PY-EU vs. OC-EA	rs10106001	8	142772674	na	281	0
PY-EU vs. OC-EA	rs7020418	9	5598427	na	141	0
PY-EU vs. OC-EA	rs1887884	9	12985112	na	400	368
PY-EU vs. OC-EA	rs2383094	9	19390351	na	335	0
PY-EU vs. OC-EA	rs10964547	9	20361299	MLLT3	344	0
PY-EU vs. OC-EA	rs1679018	9	22234280	na	31	0
PY-EU vs. OC-EA	rs7871143	9	22318194	na	26	0
PY-EU vs. OC-EA	rs4979136	9	109400704	na	2	0
PY-EU vs. OC-EA	rs10818834	9	125357145	DENND1A	23	0
PY-EU vs. OC-EA	rs913783	9	125473924	DENND1A	25	0
PY-EU vs. OC-EA	rs10986088	9	125483780	DENND1A	18	0
PY-EU vs. OC-EA	rs7850520	9	125549627	DENND1A	37	0
PY-EU vs. OC-EA	rs2479106	9	125565033	DENND1A	57	0
PY-EU vs. OC-EA	rs2670139	9	125674076	DENND1A	64	0
PY-EU vs. OC-EA	rs1041205	9	126620825	na	136	0
PY-EU vs. OC-EA	rs11244164	9	132725937	ABL1	186	0
PY-EU vs. OC-EA	rs3780282	9	132733475	ABL1	141	0
PY-EU vs. OC-EA	rs12005009	9	132745575	ABL1	35	0
PY-EU vs. OC-EA	rs4075060	10	5534093	na	44	0
PY-EU vs. OC-EA	rs10795600	10	8326874	na	420	0
PY-EU vs. OC-EA	rs201109	10	11081973	na	239	0
PY-EU vs. OC-EA	rs1875594	10	11385351	CUGBP2	949	0
PY-EU vs. OC-EA	rs4497319	10	49942478	C10orf72	130	0
PY-EU vs. OC-EA	rs35648	10	80171865	na	577	0
PY-EU vs. OC-EA	rs7917933	10	83650872	NRG3	173	0
PY-EU vs. OC-EA	rs910585	10	83652028	NRG3	178	0
PY-EU vs. OC-EA	rs6584407	10	83666389	NRG3	155	0
PY-EU vs. OC-EA	rs884700	10	87884268	GRID1	361	0
PY-EU vs. OC-EA	rs603424	10	102065469	PKD2L1	43	0
PY-EU vs. OC-EA	rs1050755	10	112043589	SMNDC1	69	0
PY-EU vs. OC-EA	rs853577	10	119811326	na	605	0
PY-EU vs. OC-EA	rs3120134	10	132136144	na	104	0
PY-EU vs. OC-EA	rs4397751	10	132473446	na	28	0
PY-EU vs. OC-EA	rs1531481	11	6198343	C11orf56	448	0
PY-EU vs. OC-EA	rs1876826	11	6207698	C11orf56	143	0
PY-EU vs. OC-EA	rs10741780	11	19556547	na	657	638
PY-EU vs. OC-EA	rs10766573	11	19566520	na	71	74
PY-EU vs. OC-EA	rs10741784	11	19582516	na	81	53
PY-EU vs. OC-EA	rs1487214	11	19588715	na	311	1
PY-EU vs. OC-EA	rs10741789	11	19652991	na	20	18
PY-EU vs. OC-EA	rs2012651	11	19656753	na	56	0
PY-EU vs. OC-EA	rs10833635	11	21786940	na	43	0
PY-EU vs. OC-EA	rs10834974	11	26379553	TMEM16C	28	0
PY-EU vs. OC-EA	rs7113405	11	26395062	TMEM16C	21	0
PY-EU vs. OC-EA	rs939505	11	28670715	na	13	0
PY-EU vs. OC-EA	rs326765	11	29562842	LOC729560	672	0
PY-EU vs. OC-EA	rs1614778	11	31911312	na	29	0
PY-EU vs. OC-EA	rs4370927	11	40780775	na	86	0
PY-EU vs. OC-EA	rs12146589	11	40794427	na	122	0
PY-EU vs. OC-EA	rs10430982	11	40831707	na	94	0
PY-EU vs. OC-EA	rs7929217	11	40835136	na	687	0
PY-EU vs. OC-EA	rs4755563	11	40843097	na	853	0
PY-EU vs. OC-EA	rs4755957	11	45058114	na	126	4
PY-EU vs. OC-EA	rs10838635	11	46901803	na	36	0
PY-EU vs. OC-EA	rs9651726	11	60825934	DDB1,LOC652707	25	38
PY-EU vs. OC-EA	rs2943808	11	61022270	LOC728834	128	0
PY-EU vs. OC-EA	rs11230851	11	61507724	na	83	0
PY-EU vs. OC-EA	rs11020772	11	88018980	GRM5	211	0
PY-EU vs. OC-EA	rs3824933	11	100824741	na	19	0
PY-EU vs. OC-EA	rs7931399	11	100828343	TRPC6	28	0
PY-EU vs. OC-EA	rs4396256	11	100836017	TRPC6	10	0
PY-EU vs. OC-EA	rs563816	11	105736354	na	40	0
PY-EU vs. OC-EA	rs618453	11	105738304	na	55	0
PY-EU vs. OC-EA	rs638300	11	105750678	na	50	0
PY-EU vs. OC-EA	rs7949651	11	129337480	PRDM10	357	0
PY-EU vs. OC-EA	rs7938683	11	129352189	PRDM10	107	0
PY-EU vs. OC-EA	rs10848765	12	3011756	TEAD4	47	0
PY-EU vs. OC-EA	rs4766030	12	3020435	TEAD4	36	0
PY-EU vs. OC-EA	rs7975017	12	26320060	na	97	0
PY-EU vs. OC-EA	rs11169005	12	48097578	SPATS2	30	0
PY-EU vs. OC-EA	rs7133398	12	48132893	SPATS2	212	0
PY-EU vs. OC-EA	rs7975712	12	48191980	SPATS2	84	0
PY-EU vs. OC-EA	rs11169063	12	48217852	KCNH3	1	0
PY-EU vs. OC-EA	rs4759058	12	52625319	HOXC13	16	0
PY-EU vs. OC-EA	rs971779	12	64468722	na	32	0
PY-EU vs. OC-EA	rs11834900	12	64533318	HMGA2	34	0
PY-EU vs. OC-EA	rs795943	12	77187598	na	25	0
PY-EU vs. OC-EA	rs12578742	12	110107363	CUTL2	104	0
PY-EU vs. OC-EA	rs630512	12	110436550	ATXN2	174	0
PY-EU vs. OC-EA	rs886205	12	110688810	ALDH2	57	38
PY-EU vs. OC-EA	rs3742000	12	110822922	na	114	73
PY-EU vs. OC-EA	rs2339941	12	110975147	C12orf30	93	0
PY-EU vs. OC-EA	rs4767364	12	111005831	C12orf30	97	0
PY-EU vs. OC-EA	rs7304572	12	111009456	C12orf30	102	0
PY-EU vs. OC-EA	rs1468253	12	111260425	na	111	0
PY-EU vs. OC-EA	rs7974383	12	111279097	na	103	1
PY-EU vs. OC-EA	rs739787	12	111465954	na	628	0
PY-EU vs. OC-EA	rs741334	12	111469711	na	189	0
PY-EU vs. OC-EA	rs1544656	12	111492716	na	714	0
PY-EU vs. OC-EA	rs9511997	13	18669535	na	10	0
PY-EU vs. OC-EA	rs9508901	13	19275448	na	227	0
PY-EU vs. OC-EA	rs3783036	13	19334506	ZMYM5,LOC400099	374	0
PY-EU vs. OC-EA	rs4394935	13	24678108	na	160	0
PY-EU vs. OC-EA	rs2485773	13	37868825	na	384	0
PY-EU vs. OC-EA	rs2323883	13	38017082	na	80	0
PY-EU vs. OC-EA	rs6563828	13	39856163	na	31	0
PY-EU vs. OC-EA	rs2152865	13	44249560	na	152	0
PY-EU vs. OC-EA	rs706593	13	50181579	na	439	0
PY-EU vs. OC-EA	rs4338667	13	67094362	na	300	0
PY-EU vs. OC-EA	rs2325065	13	67139945	na	348	0
PY-EU vs. OC-EA	rs1411888	13	67279004	na	153	0
PY-EU vs. OC-EA	rs7989612	13	67300145	na	378	0
PY-EU vs. OC-EA	rs2104388	13	73573574	KLF12,LOC730245	177	0
PY-EU vs. OC-EA	rs4885151	13	73595857	KLF12,LOC730245	181	0
PY-EU vs. OC-EA	rs9543561	13	73769467	na	737	0
PY-EU vs. OC-EA	rs7321013	13	73776938	na	88	0
PY-EU vs. OC-EA	rs9600257	13	73781037	na	142	0
PY-EU vs. OC-EA	rs4771999	13	96951437	na	138	0
PY-EU vs. OC-EA	rs773360	13	104174455	na	72	0
PY-EU vs. OC-EA	rs773358	13	104175464	na	457	348
PY-EU vs. OC-EA	rs1328105	13	105322975	na	490	0
PY-EU vs. OC-EA	rs7328053	13	108099789	MYO16	89	0
PY-EU vs. OC-EA	rs1926533	13	108100865	MYO16	103	0
PY-EU vs. OC-EA	rs8013143	14	22564117	PSMB5	31	0
PY-EU vs. OC-EA	rs941718	14	22564888	PSMB5	35	0
PY-EU vs. OC-EA	rs7146642	14	33293783	NPAS3	87	0
PY-EU vs. OC-EA	rs7156058	14	56041825	na	344	0
PY-EU vs. OC-EA	rs2719921	15	23042723	na	479	474
PY-EU vs. OC-EA	rs1597196	15	25968517	OCA2	319	0
PY-EU vs. OC-EA	rs12914224	15	32902602	na	35	0
PY-EU vs. OC-EA	rs281282	15	45466549	na	126	0
PY-EU vs. OC-EA	rs4774702	15	52754901	na	484	0
PY-EU vs. OC-EA	rs1387386	15	60998928	na	49	0
PY-EU vs. OC-EA	rs8026167	15	61001259	na	33	0
PY-EU vs. OC-EA	rs4777126	15	67294514	GLCE	22	0
PY-EU vs. OC-EA	rs2912221	15	70389763	BRUNOL6	999	0
PY-EU vs. OC-EA	rs4777501	15	70416775	na	986	983
PY-EU vs. OC-EA	rs1564784	15	72332201	na	181	0
PY-EU vs. OC-EA	rs2959823	15	74200584	C15orf27	75	0
PY-EU vs. OC-EA	rs7183668	15	77043213	RASGRF1	100	0
PY-EU vs. OC-EA	rs8025146	15	86538838	NTRK3	593	0
PY-EU vs. OC-EA	rs2165746	15	96592901	na	708	0
PY-EU vs. OC-EA	rs2654637	15	98841311	LASS3	224	0
PY-EU vs. OC-EA	rs1910410	15	98856370	LASS3	549	0
PY-EU vs. OC-EA	rs4461053	15	99219115	LOC145757	525	0
PY-EU vs. OC-EA	rs12441450	15	99226990	na	475	0
PY-EU vs. OC-EA	rs2667672	16	1476381	LOC390667	49	0
PY-EU vs. OC-EA	rs11861975	16	1656295	CRAMP1L	107	0
PY-EU vs. OC-EA	rs9938257	16	4322608	GLIS2	84	0
PY-EU vs. OC-EA	rs3747579	16	4385328	CORO7	125	0
PY-EU vs. OC-EA	rs3747581	16	4402620	CORO7	59	0
PY-EU vs. OC-EA	rs2191128	16	7747831	na	66	0
PY-EU vs. OC-EA	rs4787076	16	7750161	na	106	0
PY-EU vs. OC-EA	rs4787079	16	7766056	na	18	0
PY-EU vs. OC-EA	rs2290829	16	22203987	EEF2K	621	0
PY-EU vs. OC-EA	rs1946274	16	22666848	na	395	0
PY-EU vs. OC-EA	rs11859822	16	28902558	SPNS1,LAT	306	0
PY-EU vs. OC-EA	rs1872667	16	29206878	na	34	0
PY-EU vs. OC-EA	rs6500253	16	46639397	na	23	0
PY-EU vs. OC-EA	rs546791	16	46658136	na	704	0
PY-EU vs. OC-EA	rs5005161	16	52256177	RPGRIP1L	94	0
PY-EU vs. OC-EA	rs8059496	16	67673150	na	74	0
PY-EU vs. OC-EA	rs7203264	16	67682470	na	28	0
PY-EU vs. OC-EA	rs3785074	16	67964487	TERF2	31	0
PY-EU vs. OC-EA	rs9928718	16	73634239	ZNRF1	687	0
PY-EU vs. OC-EA	rs878891	16	73673204	ZNRF1	307	0
PY-EU vs. OC-EA	rs7203676	16	77148426	na	84	0
PY-EU vs. OC-EA	rs4547344	16	78341778	LOC440389	200	0
PY-EU vs. OC-EA	rs4603571	16	78354757	LOC440389	50	0
PY-EU vs. OC-EA	rs4889026	16	78365616	na	44	0
PY-EU vs. OC-EA	rs4243183	16	78386276	na	18	0
PY-EU vs. OC-EA	rs1134715	16	78390258	na	22	0
PY-EU vs. OC-EA	rs4889035	16	78391762	na	23	0
PY-EU vs. OC-EA	rs4299168	16	78392929	na	27	0
PY-EU vs. OC-EA	rs6564708	16	78400537	na	31	0
PY-EU vs. OC-EA	rs305082	16	84494479	IRF8	536	0
PY-EU vs. OC-EA	rs11871188	17	2308257	METT10D	862	0
PY-EU vs. OC-EA	rs2028600	17	2325288	METT10D	405	0
PY-EU vs. OC-EA	rs1078643	17	10647966	na	114	0
PY-EU vs. OC-EA	rs12452203	17	13228570	na	25	0
PY-EU vs. OC-EA	rs854462	17	31410203	na	660	0
PY-EU vs. OC-EA	rs854469	17	31413474	na	339	0
PY-EU vs. OC-EA	rs7216086	17	34962948	na	46	0
PY-EU vs. OC-EA	rs7212972	17	37234345	NT5C3L	24	0
PY-EU vs. OC-EA	rs4796729	17	37295202	ACLY	22	0
PY-EU vs. OC-EA	rs11652600	17	37404105	DNAJC7	26	0
PY-EU vs. OC-EA	rs4796754	17	37407211	DNAJC7	27	0
PY-EU vs. OC-EA	rs7226263	17	42170068	NSF	198	0
PY-EU vs. OC-EA	rs12325819	17	42171296	NSF	4	0
PY-EU vs. OC-EA	rs2912553	17	51193521	PCTP	78	0
PY-EU vs. OC-EA	rs2110202	17	51837308	ANKFN1	46	0
PY-EU vs. OC-EA	rs10515130	17	51933919	na	42	0
PY-EU vs. OC-EA	rs8069636	17	51943898	na	44	0
PY-EU vs. OC-EA	rs8067682	17	54574173	FAM33A	67	0
PY-EU vs. OC-EA	rs2109265	17	58307001	na	71	0
PY-EU vs. OC-EA	rs11079697	17	62990552	PITPNC1	55	0
PY-EU vs. OC-EA	rs1369299	17	70858920	GRB2	148	0
PY-EU vs. OC-EA	rs9899687	17	70869854	GRB2	853	0
PY-EU vs. OC-EA	rs9302989	17	70870865	GRB2	147	0
PY-EU vs. OC-EA	rs959260	17	70881017	GRB2	181	0
PY-EU vs. OC-EA	rs4789182	17	70886540	GRB2	95	0
PY-EU vs. OC-EA	rs9302994	17	71418529	FBF1	26	0
PY-EU vs. OC-EA	rs3682	17	71453745	ACOX1	42	0
PY-EU vs. OC-EA	rs8065144	17	71471452	ACOX1	56	0
PY-EU vs. OC-EA	rs2376999	17	74402459	TIMP2,LOC732206	50	0
PY-EU vs. OC-EA	rs1543229	18	4120516	LOC388458	684	0
PY-EU vs. OC-EA	rs2159637	18	9828349	RAB31	567	0
PY-EU vs. OC-EA	rs4043684	18	19922062	C18orf17	100	0
PY-EU vs. OC-EA	rs9961271	18	23217439	FLJ45994	158	0
PY-EU vs. OC-EA	rs1037753	18	28210472	FAM59A	74	0
PY-EU vs. OC-EA	rs16963287	18	28221331	FAM59A	23	0
PY-EU vs. OC-EA	rs11082588	18	43244969	na	154	0
PY-EU vs. OC-EA	rs1036348	18	43252022	na	160	0
PY-EU vs. OC-EA	rs7505051	18	43255771	na	127	0
PY-EU vs. OC-EA	rs12968614	18	66516773	na	251	0
PY-EU vs. OC-EA	rs1432073	18	68339586	na	50	0
PY-EU vs. OC-EA	rs7240426	18	68348351	na	104	0
PY-EU vs. OC-EA	rs2289863	19	3979783	PIAS4	56	0
PY-EU vs. OC-EA	rs350832	19	4020426	na	202	0
PY-EU vs. OC-EA	rs350886	19	4041113	MAP2K2	208	0
PY-EU vs. OC-EA	rs2238640	19	5212506	FUT6,PTPRS	73	0
PY-EU vs. OC-EA	rs3787058	19	6184431	MLLT1	125	0
PY-EU vs. OC-EA	rs2385089	19	18411434	na	50	0
PY-EU vs. OC-EA	rs2278238	19	18437484	ELL	42	0
PY-EU vs. OC-EA	rs12980509	19	22744786	ZNF99	103	0
PY-EU vs. OC-EA	rs7250000	19	56578734	LIM2	40	0
PY-EU vs. OC-EA	rs3810168	19	60588521	RPL28,LOC388564	518	0
PY-EU vs. OC-EA	rs6140448	20	785800	na	23	0
PY-EU vs. OC-EA	rs6077138	20	7000333	na	81	0
PY-EU vs. OC-EA	rs2050223	20	15649814	MACROD2	45	0
PY-EU vs. OC-EA	rs6058388	20	34035260	C20orf152	10	0
PY-EU vs. OC-EA	rs4812858	20	42782631	WISP2	19	0
PY-EU vs. OC-EA	rs228832	20	49493555	NFATC2	45	0
PY-EU vs. OC-EA	rs1001347	20	49972378	na	938	0
PY-EU vs. OC-EA	rs6063838	20	50641687	na	121	132
PY-EU vs. OC-EA	rs1884000	20	50643665	na	132	124
PY-EU vs. OC-EA	rs2870355	20	52747513	na	358	0
PY-EU vs. OC-EA	rs1028546	20	53171407	na	236	0
PY-EU vs. OC-EA	rs237655	20	58957235	na	246	0
PY-EU vs. OC-EA	rs6061373	20	59427294	CDH4	185	0
PY-EU vs. OC-EA	rs387098	20	61625038	na	40	33
PY-EU vs. OC-EA	rs310644	20	61629948	PTK6	51	65
PY-EU vs. OC-EA	rs2828136	21	23712292	na	215	0
PY-EU vs. OC-EA	rs7278220	21	41647250	FAM3B	49	0
PY-EU vs. OC-EA	rs2838464	21	44245507	na	446	0
PY-EU vs. OC-EA	rs8126958	21	44252706	na	101	0
PY-EU vs. OC-EA	rs2238711	21	44278384	TMEM1	77	0
PY-EU vs. OC-EA	rs2255828	21	44316343	TMEM1	60	0
PY-EU vs. OC-EA	rs2245462	21	44323599	TMEM1	93	0
PY-EU vs. OC-EA	rs2071152	21	44327549	TMEM1	144	0
PY-EU vs. OC-EA	rs2020945	21	44353347	PWP2	37	0
PY-EU vs. OC-EA	rs2838490	21	44373224	PWP2	62	0
PY-EU vs. OC-EA	rs2838491	21	44378972	C21orf33	130	0
PY-EU vs. OC-EA	rs4819376	21	44379507	C21orf33	55	0
PY-EU vs. OC-EA	rs2838502	21	44395416	na	44	0
PY-EU vs. OC-EA	rs7280558	21	44401530	na	111	0
PY-EU vs. OC-EA	rs5996577	22	22251427	IGLL1	29	0
PY-EU vs. OC-EA	rs6006405	22	28950627	na	76	0
PY-EU vs. OC-EA	rs5758742	22	41197842	na	136	0
PY-EU vs. OC-EA	rs137129	22	41350266	CYB5R3	234	0
PY-EU vs. OC-EA	rs761879	22	48627214	na	53	0
PY-EU vs. OC-EA	rs2092982	22	48668208	ZBED4	82	0
PY-EU vs. OC-EA	rs1321	22	48683439	ALG12	79	0
PY-EU vs. OC-SA	rs878063	1	3462788	MEGF6	70	0
PY-EU vs. OC-SA	rs6666330	1	4937672	na	55	0
PY-EU vs. OC-SA	rs12076190	1	5751626	na	91	0
PY-EU vs. OC-SA	rs1220405	1	9844832	CTNNBIP1	29	17
PY-EU vs. OC-SA	rs11828	1	9909594	na	41	0
PY-EU vs. OC-SA	rs1220421	1	9930808	NMNAT1	127	0
PY-EU vs. OC-SA	rs2890358	1	9950127	NMNAT1	192	0
PY-EU vs. OC-SA	rs7528979	1	10016044	UBE4B	16	23
PY-EU vs. OC-SA	rs6671289	1	10118527	UBE4B	31	0
PY-EU vs. OC-SA	rs2273299	1	10141026	UBE4B	26	10
PY-EU vs. OC-SA	rs355021	1	13780376	na	141	0
PY-EU vs. OC-SA	rs647325	1	18043473	na	26	0
PY-EU vs. OC-SA	rs6667223	1	21961428	USP48	26	0
PY-EU vs. OC-SA	rs4649203	1	24392507	na	27	0
PY-EU vs. OC-SA	rs2504786	1	27592765	GPR3	47	0
PY-EU vs. OC-SA	rs4908343	1	27804285	na	19	0
PY-EU vs. OC-SA	rs7367713	1	35929019	na	219	0
PY-EU vs. OC-SA	rs7537203	1	35998535	CLSPN	171	175
PY-EU vs. OC-SA	rs10908410	1	36014615	na	205	0
PY-EU vs. OC-SA	rs12083902	1	36047699	EIF2C4	208	0
PY-EU vs. OC-SA	rs634335	1	36108449	na	428	0
PY-EU vs. OC-SA	rs6665591	1	36184324	EIF2C3	99	0
PY-EU vs. OC-SA	rs630364	1	36221891	EIF2C3	57	0
PY-EU vs. OC-SA	rs3754076	1	36321744	TEKT2	92	0
PY-EU vs. OC-SA	rs274751	1	36334665	COL8A2	131	0
PY-EU vs. OC-SA	rs7538300	1	39425351	MACF1	29	0
PY-EU vs. OC-SA	rs6699928	1	39506086	MACF1	31	0
PY-EU vs. OC-SA	rs10888788	1	39710283	MACF1	35	0
PY-EU vs. OC-SA	rs6679121	1	47639737	na	35	0
PY-EU vs. OC-SA	rs11205809	1	51320012	na	31	0
PY-EU vs. OC-SA	rs2280511	1	53748776	GLIS1	69	0
PY-EU vs. OC-SA	rs334720	1	61411339	NFIA	100	0
PY-EU vs. OC-SA	rs6664692	1	62968248	na	137	0
PY-EU vs. OC-SA	rs4529740	1	63969629	na	30	0
PY-EU vs. OC-SA	rs2658423	1	63970566	na	54	0
PY-EU vs. OC-SA	rs1754546	1	63989246	na	67	0
PY-EU vs. OC-SA	rs583192	1	64017940	ROR1	44	0
PY-EU vs. OC-SA	rs659207	1	64037369	ROR1	20	0
PY-EU vs. OC-SA	rs592298	1	64060648	ROR1	28	0
PY-EU vs. OC-SA	rs683574	1	64064528	ROR1	51	0
PY-EU vs. OC-SA	rs7528814	1	64374433	ROR1	23	0
PY-EU vs. OC-SA	rs1932028	1	64747189	CACHD1	18	0
PY-EU vs. OC-SA	rs228563	1	79418807	na	125	0
PY-EU vs. OC-SA	rs7524907	1	81640067	na	16	0
PY-EU vs. OC-SA	rs10875081	1	92180039	na	15	0
PY-EU vs. OC-SA	rs3767854	1	92237251	BRDT	22	0
PY-EU vs. OC-SA	rs3789375	1	94237720	ABCA4	55	0
PY-EU vs. OC-SA	rs7542735	1	105231100	na	25	0
PY-EU vs. OC-SA	rs1032429	1	110953090	na	20	0
PY-EU vs. OC-SA	rs4839072	1	110956801	na	27	0
PY-EU vs. OC-SA	rs1146353	1	116447280	na	39	0
PY-EU vs. OC-SA	rs7526407	1	145537233	BCL9	67	0
PY-EU vs. OC-SA	rs3126091	1	150573962	na	62	0
PY-EU vs. OC-SA	rs4845700	1	153248332	na	990	0
PY-EU vs. OC-SA	rs11264359	1	153549453	FDPS	60	0
PY-EU vs. OC-SA	rs12134393	1	158778848	na	45	0
PY-EU vs. OC-SA	rs6426942	1	164091790	UCK2	191	0
PY-EU vs. OC-SA	rs1884994	1	172216905	RC3H1	30	0
PY-EU vs. OC-SA	rs6677660	1	172281130	na	18	0
PY-EU vs. OC-SA	rs6689285	1	172286356	na	20	0
PY-EU vs. OC-SA	rs10458366	1	175974550	na	95	0
PY-EU vs. OC-SA	rs3767184	1	178407990	QSOX1	24	0
PY-EU vs. OC-SA	rs3001167	1	192797537	na	448	0
PY-EU vs. OC-SA	rs3009384	1	192809906	na	397	0
PY-EU vs. OC-SA	rs10801339	1	192821954	na	84	0
PY-EU vs. OC-SA	rs2297901	1	199302230	CACNA1S	22	0
PY-EU vs. OC-SA	rs10900597	1	202789112	na	54	0
PY-EU vs. OC-SA	rs7535216	1	203064083	NFASC	1	0
PY-EU vs. OC-SA	rs1159179	1	212175264	na	181	0
PY-EU vs. OC-SA	rs7541947	1	231228445	PCNXL2	27	0
PY-EU vs. OC-SA	rs10802738	1	237222993	na	37	0
PY-EU vs. OC-SA	rs7525142	1	238809528	GREM2	9	0
PY-EU vs. OC-SA	rs9661248	1	243001296	na	313	0
PY-EU vs. OC-SA	rs7547858	1	244247693	SMYD3	16	0
PY-EU vs. OC-SA	rs6542651	2	3737705	LOC728597,LOC731008	302	0
PY-EU vs. OC-SA	rs771311	2	7002642	RNF144A	24	0
PY-EU vs. OC-SA	rs4669614	2	10792122	ATP6V1C2	174	0
PY-EU vs. OC-SA	rs10929734	2	11431841	na	13	0
PY-EU vs. OC-SA	rs10495620	2	14034442	na	772	0
PY-EU vs. OC-SA	rs7596212	2	14064899	na	38	0
PY-EU vs. OC-SA	rs1878832	2	14074245	na	39	0
PY-EU vs. OC-SA	rs12613665	2	15893066	na	180	0
PY-EU vs. OC-SA	rs340724	2	16254180	na	47	0
PY-EU vs. OC-SA	rs7570727	2	18235432	na	174	0
PY-EU vs. OC-SA	rs2704633	2	18500559	na	263	0
PY-EU vs. OC-SA	rs746776	2	20739867	na	89	0
PY-EU vs. OC-SA	rs1108460	2	38203511	na	15	0
PY-EU vs. OC-SA	rs930493	2	54911702	na	59	0
PY-EU vs. OC-SA	rs6715352	2	56913635	na	92	0
PY-EU vs. OC-SA	rs2061517	2	57767125	na	137	0
PY-EU vs. OC-SA	rs6731365	2	57789377	na	256	0
PY-EU vs. OC-SA	rs11695927	2	65676524	FLJ16124	202	0
PY-EU vs. OC-SA	rs6546167	2	65692358	FLJ16124	169	0
PY-EU vs. OC-SA	rs4671675	2	65715159	FLJ16124	197	0
PY-EU vs. OC-SA	rs6546171	2	65737038	FLJ16124	156	0
PY-EU vs. OC-SA	rs7584385	2	69094763	ANTXR1	34	0
PY-EU vs. OC-SA	rs3813227	2	73505475	ALMS1	76	0
PY-EU vs. OC-SA	rs6745054	2	74303633	SLC4A5	264	0
PY-EU vs. OC-SA	rs10186197	2	83970367	na	106	0
PY-EU vs. OC-SA	rs13420155	2	83974519	na	88	0
PY-EU vs. OC-SA	rs942151	2	84029037	na	118	101
PY-EU vs. OC-SA	rs7594352	2	84032999	na	110	110
PY-EU vs. OC-SA	rs1447537	2	84100097	na	1	0
PY-EU vs. OC-SA	rs7558055	2	84144585	na	13	0
PY-EU vs. OC-SA	rs1258411	2	88399211	na	21	0
PY-EU vs. OC-SA	rs7594727	2	96853597	CNNM3	22	0
PY-EU vs. OC-SA	rs7603256	2	96931116	na	63	0
PY-EU vs. OC-SA	rs7592101	2	96943234	na	16	0
PY-EU vs. OC-SA	rs7594227	2	96969475	na	16	0
PY-EU vs. OC-SA	rs9917224	2	100527482	na	11	0
PY-EU vs. OC-SA	rs6543042	2	101398603	FLJ42986	25	0
PY-EU vs. OC-SA	rs958790	2	101402192	FLJ42986	46	0
PY-EU vs. OC-SA	rs730631	2	108317264	LOC151234	47	0
PY-EU vs. OC-SA	rs10167564	2	108355057	na	37	0
PY-EU vs. OC-SA	rs13390901	2	108391443	na	6	0
PY-EU vs. OC-SA	rs12478500	2	108780535	CCDC138	226	0
PY-EU vs. OC-SA	rs1478515	2	108867361	na	359	0
PY-EU vs. OC-SA	rs1478516	2	108867498	na	350	0
PY-EU vs. OC-SA	rs1548039	2	120835391	na	466	0
PY-EU vs. OC-SA	rs4663057	2	127362483	LOC339760,LOC651281	23	0
PY-EU vs. OC-SA	rs2062154	2	131368451	LOC730032	275	0
PY-EU vs. OC-SA	rs1370602	2	133405442	NAP5	14	0
PY-EU vs. OC-SA	rs4954112	2	134650870	na	731	0
PY-EU vs. OC-SA	rs10210687	2	137105967	na	50	0
PY-EU vs. OC-SA	rs352188	2	138070206	THSD7B	32	0
PY-EU vs. OC-SA	rs13429725	2	147009118	na	31	0
PY-EU vs. OC-SA	rs9653189	2	147035129	na	39	0
PY-EU vs. OC-SA	rs10497010	2	147678733	na	41	0
PY-EU vs. OC-SA	rs1438888	2	147920775	na	211	0
PY-EU vs. OC-SA	rs6430189	2	147958252	na	237	0
PY-EU vs. OC-SA	rs6713162	2	152204772	NEB	23	37
PY-EU vs. OC-SA	rs4664494	2	152207826	NEB	17	2
PY-EU vs. OC-SA	rs4536649	2	152222999	NEB	21	0
PY-EU vs. OC-SA	rs7426114	2	152235818	NEB	16	16
PY-EU vs. OC-SA	rs6733909	2	152254444	NEB	25	22
PY-EU vs. OC-SA	rs11695661	2	152272596	NEB	25	0
PY-EU vs. OC-SA	rs4300824	2	152290112	NEB	23	0
PY-EU vs. OC-SA	rs4274593	2	152317678	na	18	0
PY-EU vs. OC-SA	rs4309576	2	152320491	na	19	19
PY-EU vs. OC-SA	rs10167462	2	152348204	na	23	0
PY-EU vs. OC-SA	rs7419564	2	152428276	CACNB4	14	0
PY-EU vs. OC-SA	rs10490534	2	154646176	GALNT13	8	0
PY-EU vs. OC-SA	rs3017019	2	158278766	na	25	0
PY-EU vs. OC-SA	rs6756623	2	158282323	na	48	0
PY-EU vs. OC-SA	rs4664901	2	158420784	na	11	0
PY-EU vs. OC-SA	rs12479151	2	158434801	na	12	0
PY-EU vs. OC-SA	rs4363980	2	158458286	na	14	15
PY-EU vs. OC-SA	rs4438436	2	158458700	na	17	14
PY-EU vs. OC-SA	rs1441134	2	158465447	na	18	0
PY-EU vs. OC-SA	rs12472133	2	158473276	na	11	0
PY-EU vs. OC-SA	rs7578180	2	158480304	na	25	0
PY-EU vs. OC-SA	rs6437126	2	158574077	UPP2	28	0
PY-EU vs. OC-SA	rs11884055	2	163217861	KCNH7	34	0
PY-EU vs. OC-SA	rs1435009	2	163245666	KCNH7	26	0
PY-EU vs. OC-SA	rs11682423	2	163304213	KCNH7	36	0
PY-EU vs. OC-SA	rs11888830	2	163846552	na	263	0
PY-EU vs. OC-SA	rs1837103	2	164472128	na	83	0
PY-EU vs. OC-SA	rs6706172	2	174373633	na	141	0
PY-EU vs. OC-SA	rs13032587	2	177391650	na	65	0
PY-EU vs. OC-SA	rs10207436	2	179002857	PRKRA	30	0
PY-EU vs. OC-SA	rs2288322	2	179031363	na	26	0
PY-EU vs. OC-SA	rs6759838	2	184992674	na	132	0
PY-EU vs. OC-SA	rs4667295	2	190212635	na	22	0
PY-EU vs. OC-SA	rs7568449	2	190229299	na	26	0
PY-EU vs. OC-SA	rs11679767	2	190254545	ANKAR	18	0
PY-EU vs. OC-SA	rs6434450	2	191746869	na	82	0
PY-EU vs. OC-SA	rs1377656	2	195551256	na	14	0
PY-EU vs. OC-SA	rs7608598	2	195561313	na	1	0
PY-EU vs. OC-SA	rs777728	2	195695738	na	413	0
PY-EU vs. OC-SA	rs4850693	2	196844051	HECW2	47	0
PY-EU vs. OC-SA	rs6709519	2	213387054	na	248	0
PY-EU vs. OC-SA	rs4673693	2	213389218	na	33	0
PY-EU vs. OC-SA	rs1831024	2	215567073	ABCA12	149	0
PY-EU vs. OC-SA	rs940279	2	215580579	ABCA12	172	0
PY-EU vs. OC-SA	rs2948974	2	215677174	ABCA12	1	0
PY-EU vs. OC-SA	rs2970968	2	215710235	ABCA12	332	0
PY-EU vs. OC-SA	rs371825	2	219571900	na	56	0
PY-EU vs. OC-SA	rs2577284	2	224637656	na	112	0
PY-EU vs. OC-SA	rs1160135	2	226479179	na	35	0
PY-EU vs. OC-SA	rs10451554	2	226482566	na	7	0
PY-EU vs. OC-SA	rs13031468	2	226503472	na	24	20
PY-EU vs. OC-SA	rs10192769	2	227408162	RHBDD1	100	0
PY-EU vs. OC-SA	rs6715560	2	231486014	GPR55	35	0
PY-EU vs. OC-SA	rs9287582	2	235586885	SH3BP4	755	0
PY-EU vs. OC-SA	rs9287583	2	235588696	SH3BP4	242	0
PY-EU vs. OC-SA	rs10202062	2	238148961	RAB17	55	0
PY-EU vs. OC-SA	rs1899398	3	3745669	na	74	0
PY-EU vs. OC-SA	rs1899400	3	3745922	na	83	0
PY-EU vs. OC-SA	rs1504041	3	6140284	na	2	0
PY-EU vs. OC-SA	rs6443206	3	8795075	na	67	0
PY-EU vs. OC-SA	rs9875468	3	9052896	SRGAP3	24	0
PY-EU vs. OC-SA	rs3773282	3	13605308	FBLN2	4	0
PY-EU vs. OC-SA	rs2350310	3	13612117	FBLN2	97	0
PY-EU vs. OC-SA	rs2276747	3	13624763	FBLN2	44	0
PY-EU vs. OC-SA	rs4596126	3	13634898	FBLN2	11	0
PY-EU vs. OC-SA	rs7652319	3	22008075	na	13	0
PY-EU vs. OC-SA	rs7623065	3	22360379	na	19	0
PY-EU vs. OC-SA	rs4547724	3	23162731	na	1	0
PY-EU vs. OC-SA	rs9814223	3	24337256	THRB	68	0
PY-EU vs. OC-SA	rs1356351	3	29206395	na	27	0
PY-EU vs. OC-SA	rs4478120	3	31081143	na	1	0
PY-EU vs. OC-SA	rs7642758	3	31082706	na	54	0
PY-EU vs. OC-SA	rs9876905	3	31263547	na	344	0
PY-EU vs. OC-SA	rs9852655	3	31267688	na	65	0
PY-EU vs. OC-SA	rs2880339	3	32040730	na	20	0
PY-EU vs. OC-SA	rs2236944	3	50267197	GNAI2	117	0
PY-EU vs. OC-SA	rs888405	3	64176742	PRICKLE2	36	0
PY-EU vs. OC-SA	rs4423732	3	71826371	EIF4E3	164	0
PY-EU vs. OC-SA	rs2322692	3	73062867	GLT8D4	6	0
PY-EU vs. OC-SA	rs7641552	3	83709387	na	2	0
PY-EU vs. OC-SA	rs9827414	3	83711481	na	8	0
PY-EU vs. OC-SA	rs9825320	3	98526743	EPHA6	108	0
PY-EU vs. OC-SA	rs9848435	3	98545226	EPHA6	95	0
PY-EU vs. OC-SA	rs1598915	3	98588242	EPHA6	179	0
PY-EU vs. OC-SA	rs3937589	3	98742771	EPHA6	401	0
PY-EU vs. OC-SA	rs6439268	3	98792499	EPHA6	352	0
PY-EU vs. OC-SA	rs9842981	3	98814931	EPHA6	32	0
PY-EU vs. OC-SA	rs985632	3	100527865	na	98	0
PY-EU vs. OC-SA	rs7652907	3	100543144	na	91	0
PY-EU vs. OC-SA	rs2128027	3	100547986	na	78	0
PY-EU vs. OC-SA	rs2623382	3	100550148	na	51	0
PY-EU vs. OC-SA	rs1481532	3	100561401	na	27	0
PY-EU vs. OC-SA	rs999367	3	114463173	BOC	31	0
PY-EU vs. OC-SA	rs12490319	3	115994046	ZBTB20	213	0
PY-EU vs. OC-SA	rs9834547	3	116027142	ZBTB20	204	0
PY-EU vs. OC-SA	rs6791168	3	116042815	ZBTB20	22	0
PY-EU vs. OC-SA	rs4234649	3	118896534	na	165	0
PY-EU vs. OC-SA	rs9827972	3	120483066	na	19	0
PY-EU vs. OC-SA	rs787209	3	121523139	na	145	0
PY-EU vs. OC-SA	rs1444820	3	124194034	SEMA5B	30	0
PY-EU vs. OC-SA	rs2034177	3	124211779	SEMA5B	94	0
PY-EU vs. OC-SA	rs6799522	3	124242312	na	27	0
PY-EU vs. OC-SA	rs6791346	3	124245130	na	35	34
PY-EU vs. OC-SA	rs4293718	3	129411810	EEFSEC	18	0
PY-EU vs. OC-SA	rs2251178	3	132754129	CPNE4	208	0
PY-EU vs. OC-SA	rs6808429	3	132772981	CPNE4	277	0
PY-EU vs. OC-SA	rs1559796	3	141259848	CLSTN2	11	0
PY-EU vs. OC-SA	rs12496538	3	141266817	CLSTN2	26	0
PY-EU vs. OC-SA	rs9844835	3	141461790	CLSTN2	55	0
PY-EU vs. OC-SA	rs6440523	3	149178088	na	98	0
PY-EU vs. OC-SA	rs7634663	3	152260941	na	219	0
PY-EU vs. OC-SA	rs11915244	3	155734982	na	16	0
PY-EU vs. OC-SA	rs7628695	3	155845922	na	21	26
PY-EU vs. OC-SA	rs16826083	3	157595608	KCNAB1	27	0
PY-EU vs. OC-SA	rs6770585	3	162413565	na	183	0
PY-EU vs. OC-SA	rs7624807	3	169420582	na	72	0
PY-EU vs. OC-SA	rs9874286	3	169425673	na	41	0
PY-EU vs. OC-SA	rs10936625	3	171577602	SKIL	143	0
PY-EU vs. OC-SA	rs9878985	3	176223240	NAALADL2	63	0
PY-EU vs. OC-SA	rs13079695	3	183721442	na	22	0
PY-EU vs. OC-SA	rs13079919	3	183724575	na	20	0
PY-EU vs. OC-SA	rs2879560	3	183796723	na	18	0
PY-EU vs. OC-SA	rs9841498	3	184209791	na	28	0
PY-EU vs. OC-SA	rs10937140	3	184812588	na	64	0
PY-EU vs. OC-SA	rs6768172	3	184827217	na	4	0
PY-EU vs. OC-SA	rs918220	3	187458723	DGKG	22	0
PY-EU vs. OC-SA	rs710493	3	190177443	na	611	0
PY-EU vs. OC-SA	rs6782303	3	199130633	IQCG	64	0
PY-EU vs. OC-SA	rs7431003	3	199173607	LMLN	47	0
PY-EU vs. OC-SA	rs6605321	3	199184392	LMLN	41	0
PY-EU vs. OC-SA	rs13327370	3	199228595	LMLN	58	0
PY-EU vs. OC-SA	rs6763543	3	199251343	na	38	0
PY-EU vs. OC-SA	rs6826089	4	7317757	SORCS2	26	0
PY-EU vs. OC-SA	rs4569748	4	14441104	na	34	0
PY-EU vs. OC-SA	rs6816518	4	21671223	na	28	0
PY-EU vs. OC-SA	rs6831346	4	21690914	na	1	0
PY-EU vs. OC-SA	rs4626188	4	21703278	na	86	0
PY-EU vs. OC-SA	rs6825168	4	32406879	na	19	0
PY-EU vs. OC-SA	rs12648160	4	32412810	na	21	6
PY-EU vs. OC-SA	rs9992839	4	32447798	na	21	0
PY-EU vs. OC-SA	rs7665163	4	32467834	na	10	0
PY-EU vs. OC-SA	rs10034211	4	32627937	na	1	0
PY-EU vs. OC-SA	rs6531293	4	32651220	na	19	0
PY-EU vs. OC-SA	rs6531329	4	32711939	na	166	0
PY-EU vs. OC-SA	rs1448275	4	32726082	na	42	0
PY-EU vs. OC-SA	rs6819341	4	32740999	na	64	0
PY-EU vs. OC-SA	rs4131726	4	38142051	na	140	0
PY-EU vs. OC-SA	rs6850184	4	60842269	na	19	0
PY-EU vs. OC-SA	rs7673099	4	60869879	na	16	0
PY-EU vs. OC-SA	rs11946495	4	60920756	na	56	0
PY-EU vs. OC-SA	rs6858288	4	60940717	na	73	0
PY-EU vs. OC-SA	rs1455706	4	60942502	na	55	0
PY-EU vs. OC-SA	rs6814822	4	61036595	na	94	0
PY-EU vs. OC-SA	rs7441398	4	63335730	na	103	0
PY-EU vs. OC-SA	rs6841028	4	63352170	na	126	0
PY-EU vs. OC-SA	rs2175327	4	67089580	na	54	0
PY-EU vs. OC-SA	rs2203018	4	67106990	na	47	0
PY-EU vs. OC-SA	rs1510742	4	67115040	na	82	0
PY-EU vs. OC-SA	rs4032303	4	67146302	na	93	0
PY-EU vs. OC-SA	rs2472649	4	75076572	na	48	0
PY-EU vs. OC-SA	rs2055177	4	82063550	C4orf22	139	0
PY-EU vs. OC-SA	rs11733577	4	89393217	na	17	0
PY-EU vs. OC-SA	rs9985612	4	90810912	na	101	0
PY-EU vs. OC-SA	rs6824746	4	91248215	na	18	0
PY-EU vs. OC-SA	rs7678183	4	91534459	MGC48628	55	0
PY-EU vs. OC-SA	rs6814827	4	91559691	MGC48628	51	0
PY-EU vs. OC-SA	rs7687283	4	102093061	na	188	0
PY-EU vs. OC-SA	rs13123618	4	110590316	SEC24B	31	0
PY-EU vs. OC-SA	rs7659671	4	124507862	na	34	0
PY-EU vs. OC-SA	rs300553	4	124516899	na	73	0
PY-EU vs. OC-SA	rs1033018	4	131434925	na	29	0
PY-EU vs. OC-SA	rs1391099	4	143593360	na	39	0
PY-EU vs. OC-SA	rs1425531	4	143645481	na	31	0
PY-EU vs. OC-SA	rs7657997	4	151735416	LRBA	27	33
PY-EU vs. OC-SA	rs10010950	4	151794289	LRBA	25	30
PY-EU vs. OC-SA	rs2407549	4	152009990	LRBA	94	0
PY-EU vs. OC-SA	rs7693278	4	152029075	LRBA	91	0
PY-EU vs. OC-SA	rs2407548	4	152069974	LRBA	77	85
PY-EU vs. OC-SA	rs10857253	4	152224234	na	101	1
PY-EU vs. OC-SA	rs11733964	4	152235154	na	86	80
PY-EU vs. OC-SA	rs12644496	4	152324798	SH3D19	193	0
PY-EU vs. OC-SA	rs2407412	4	152360849	SH3D19	218	0
PY-EU vs. OC-SA	rs6536080	4	156749056	na	94	0
PY-EU vs. OC-SA	rs7440685	4	156762545	na	33	0
PY-EU vs. OC-SA	rs4505777	4	164419696	na	54	0
PY-EU vs. OC-SA	rs12641382	4	165729934	na	19	18
PY-EU vs. OC-SA	rs1534578	4	165733752	na	27	22
PY-EU vs. OC-SA	rs10517810	4	165735616	na	24	0
PY-EU vs. OC-SA	rs2332028	4	171925443	na	73	0
PY-EU vs. OC-SA	rs1589559	4	171931314	na	56	0
PY-EU vs. OC-SA	rs2877558	4	171979791	na	276	0
PY-EU vs. OC-SA	rs10520268	4	175224846	na	193	0
PY-EU vs. OC-SA	rs11133030	4	175254410	na	29	0
PY-EU vs. OC-SA	rs13146622	4	177064358	GPM6A	43	40
PY-EU vs. OC-SA	rs2132337	4	177070212	GPM6A	21	0
PY-EU vs. OC-SA	rs11132125	4	183591553	ODZ3	292	0
PY-EU vs. OC-SA	rs7675251	4	185770685	na	482	0
PY-EU vs. OC-SA	rs4076817	5	1187166	na	22	0
PY-EU vs. OC-SA	rs2934543	5	2909417	na	117	0
PY-EU vs. OC-SA	rs12652806	5	6526308	FLJ25076	24	0
PY-EU vs. OC-SA	rs10035299	5	10665627	LOC651746	35	0
PY-EU vs. OC-SA	rs1445946	5	16780534	MYO10	74	0
PY-EU vs. OC-SA	rs1978608	5	24477358	na	125	0
PY-EU vs. OC-SA	rs4867100	5	32043470	PDZD2	116	0
PY-EU vs. OC-SA	rs7712324	5	33794270	ADAMTS12	114	0
PY-EU vs. OC-SA	rs2287934	5	36207177	SKP2	627	0
PY-EU vs. OC-SA	rs1292154	5	56020743	na	35	0
PY-EU vs. OC-SA	rs905199	5	57734051	na	509	0
PY-EU vs. OC-SA	rs918604	5	63949443	na	104	0
PY-EU vs. OC-SA	rs2113054	5	66464847	na	16	0
PY-EU vs. OC-SA	rs12659487	5	72820607	na	184	0
PY-EU vs. OC-SA	rs2434215	5	73237747	RGNEF	12	0
PY-EU vs. OC-SA	rs12519932	5	74233709	na	130	0
PY-EU vs. OC-SA	rs16875506	5	77824547	LHFPL2,LOC727723	15	0
PY-EU vs. OC-SA	rs12517576	5	88590489	na	118	0
PY-EU vs. OC-SA	rs4458614	5	90476902	GPR98	32	0
PY-EU vs. OC-SA	rs2941876	5	90514045	na	404	419
PY-EU vs. OC-SA	rs2941878	5	90515185	na	36	0
PY-EU vs. OC-SA	rs1877216	5	90521441	na	105	0
PY-EU vs. OC-SA	rs6861029	5	91918851	na	41	0
PY-EU vs. OC-SA	rs4631225	5	108840383	na	27	0
PY-EU vs. OC-SA	rs17162485	5	109327045	na	1	0
PY-EU vs. OC-SA	rs2416227	5	109371755	na	22	0
PY-EU vs. OC-SA	rs6877527	5	109764353	FLJ43080	499	0
PY-EU vs. OC-SA	rs313607	5	109822065	FLJ43080	87	0
PY-EU vs. OC-SA	rs313617	5	109845448	FLJ43080	38	0
PY-EU vs. OC-SA	rs7717246	5	109859005	FLJ43080	42	0
PY-EU vs. OC-SA	rs152220	5	110881025	na	54	0
PY-EU vs. OC-SA	rs6890872	5	112426060	MCC	34	0
PY-EU vs. OC-SA	rs2120349	5	112560834	MCC	73	0
PY-EU vs. OC-SA	rs10071816	5	112917273	YTHDC2	113	0
PY-EU vs. OC-SA	rs7729306	5	112954080	YTHDC2	101	0
PY-EU vs. OC-SA	rs3763138	5	112956764	YTHDC2	43	0
PY-EU vs. OC-SA	rs1035888	5	112962587	na	115	0
PY-EU vs. OC-SA	rs153645	5	115892477	SEMA6A	155	0
PY-EU vs. OC-SA	rs1004531	5	118632922	na	45	0
PY-EU vs. OC-SA	rs10900755	5	121533306	LOC728460	125	0
PY-EU vs. OC-SA	rs1427936	5	121534577	LOC728460	129	0
PY-EU vs. OC-SA	rs319635	5	123645197	na	41	0
PY-EU vs. OC-SA	rs151273	5	126869702	na	40	0
PY-EU vs. OC-SA	rs182844	5	126875628	na	40	0
PY-EU vs. OC-SA	rs3909885	5	126946403	na	15	0
PY-EU vs. OC-SA	rs261532	5	138929546	UBE2D2	13	0
PY-EU vs. OC-SA	rs246637	5	142390376	ARHGAP26	32	0
PY-EU vs. OC-SA	rs246636	5	142391623	ARHGAP26	40	0
PY-EU vs. OC-SA	rs245827	5	142394874	ARHGAP26	164	0
PY-EU vs. OC-SA	rs2964287	5	165852270	na	56	0
PY-EU vs. OC-SA	rs2443023	5	165903916	na	30	0
PY-EU vs. OC-SA	rs1901163	5	165909270	na	18	0
PY-EU vs. OC-SA	rs2964302	5	165911438	na	15	0
PY-EU vs. OC-SA	rs1345728	5	165963971	na	20	1
PY-EU vs. OC-SA	rs1025481	5	166858032	na	64	0
PY-EU vs. OC-SA	rs4976579	5	167541951	ODZ2	13	0
PY-EU vs. OC-SA	rs4976539	5	167569852	ODZ2	76	0
PY-EU vs. OC-SA	rs9918152	5	167570171	ODZ2	102	0
PY-EU vs. OC-SA	rs262844	5	169097914	DOCK2	35	0
PY-EU vs. OC-SA	rs155341	5	169118135	DOCK2	41	0
PY-EU vs. OC-SA	rs11744306	5	172900066	na	60	0
PY-EU vs. OC-SA	rs10076619	5	173458478	HMP19	32	0
PY-EU vs. OC-SA	rs6941983	6	12067874	na	81	0
PY-EU vs. OC-SA	rs6927024	6	12068692	na	98	0
PY-EU vs. OC-SA	rs853354	6	14278337	na	38	0
PY-EU vs. OC-SA	rs853386	6	14291007	na	73	0
PY-EU vs. OC-SA	rs853388	6	14298685	na	120	0
PY-EU vs. OC-SA	rs9460408	6	19847922	na	51	0
PY-EU vs. OC-SA	rs7742369	6	34273699	na	579	0
PY-EU vs. OC-SA	rs464553	6	34423057	NUDT3	32	0
PY-EU vs. OC-SA	rs3798560	6	34451544	NUDT3	58	0
PY-EU vs. OC-SA	rs6925243	6	34489915	na	25	25
PY-EU vs. OC-SA	rs6912327	6	34872900	C6orf107	29	0
PY-EU vs. OC-SA	rs9368849	6	35226214	na	13	0
PY-EU vs. OC-SA	rs12204488	6	43872337	na	8	0
PY-EU vs. OC-SA	rs10948309	6	46859122	na	75	0
PY-EU vs. OC-SA	rs9296695	6	52866035	na	74	0
PY-EU vs. OC-SA	rs364932	6	52909646	na	66	0
PY-EU vs. OC-SA	rs12111265	6	73426460	LOC642681,KCNQ5	47	0
PY-EU vs. OC-SA	rs2153830	6	73707383	KCNQ5	24	0
PY-EU vs. OC-SA	rs1489381	6	75072447	na	206	0
PY-EU vs. OC-SA	rs1890525	6	75084637	na	198	0
PY-EU vs. OC-SA	rs7751208	6	87596742	LOC643962	2	0
PY-EU vs. OC-SA	rs1998615	6	87865008	na	15	0
PY-EU vs. OC-SA	rs7758960	6	88952141	na	25	6
PY-EU vs. OC-SA	rs7747006	6	88953547	na	71	0
PY-EU vs. OC-SA	rs9388482	6	99012654	na	134	0
PY-EU vs. OC-SA	rs319070	6	107893445	na	55	0
PY-EU vs. OC-SA	rs7749081	6	108442038	na	256	0
PY-EU vs. OC-SA	rs809193	6	112127107	FYN	81	0
PY-EU vs. OC-SA	rs706895	6	112148052	FYN	77	0
PY-EU vs. OC-SA	rs7756527	6	118509013	SLC35F1	96	0
PY-EU vs. OC-SA	rs2679672	6	122355257	na	17	0
PY-EU vs. OC-SA	rs6569585	6	129516639	LAMA2	224	0
PY-EU vs. OC-SA	rs9492262	6	129547525	LAMA2	109	0
PY-EU vs. OC-SA	rs3778135	6	129549602	LAMA2	127	0
PY-EU vs. OC-SA	rs2876021	6	129550900	LAMA2	123	0
PY-EU vs. OC-SA	rs265371	6	129642216	LAMA2	81	0
PY-EU vs. OC-SA	rs6902875	6	132658765	MOXD1	71	0
PY-EU vs. OC-SA	rs1052502	6	135648258	AHI1	28	32
PY-EU vs. OC-SA	rs7766656	6	135659294	AHI1	22	15
PY-EU vs. OC-SA	rs9494266	6	135893266	na	30	0
PY-EU vs. OC-SA	rs7753890	6	136557950	PDE7B	904	0
PY-EU vs. OC-SA	rs703193	6	136651043	BCLAF1	17	0
PY-EU vs. OC-SA	rs6570078	6	136670412	na	73	0
PY-EU vs. OC-SA	rs7738387	6	143478977	AIG1	270	0
PY-EU vs. OC-SA	rs2136319	6	145816377	na	20	0
PY-EU vs. OC-SA	rs4425606	6	150326128	ULBP1	102	0
PY-EU vs. OC-SA	rs722208	6	152364578	ESR1	44	0
PY-EU vs. OC-SA	rs3020375	6	152431661	ESR1	14	0
PY-EU vs. OC-SA	rs6940333	6	156782342	na	91	0
PY-EU vs. OC-SA	rs6932960	6	156785155	na	105	0
PY-EU vs. OC-SA	rs9372001	6	156834565	na	15	0
PY-EU vs. OC-SA	rs1476636	7	2950046	CARD11	55	0
PY-EU vs. OC-SA	rs12532693	7	7555382	na	19	0
PY-EU vs. OC-SA	rs7803888	7	7594941	FLJ20323	20	0
PY-EU vs. OC-SA	rs2681050	7	11615998	THSD7A	3	0
PY-EU vs. OC-SA	rs6461065	7	14072405	na	51	0
PY-EU vs. OC-SA	rs11982573	7	20000424	na	33	29
PY-EU vs. OC-SA	rs6960287	7	30823866	FLJ22374	13	0
PY-EU vs. OC-SA	rs2107552	7	30827230	FLJ22374	25	0
PY-EU vs. OC-SA	rs7780081	7	30861508	FLJ22374	41	0
PY-EU vs. OC-SA	rs2107550	7	30884888	FLJ22374	22	0
PY-EU vs. OC-SA	rs260368	7	46429867	na	218	0
PY-EU vs. OC-SA	rs10278486	7	46518077	na	80	0
PY-EU vs. OC-SA	rs1019000	7	50777265	GRB10	100	0
PY-EU vs. OC-SA	rs844796	7	71120759	CALN1	112	0
PY-EU vs. OC-SA	rs844795	7	71121257	CALN1	113	0
PY-EU vs. OC-SA	rs17147989	7	80224536	SEMA3C	98	0
PY-EU vs. OC-SA	rs2157811	7	93801232	na	112	48
PY-EU vs. OC-SA	rs6465412	7	93896331	COL1A2	13	0
PY-EU vs. OC-SA	rs2023783	7	96998611	na	29	0
PY-EU vs. OC-SA	rs1541519	7	102253977	FBXL13	50	0
PY-EU vs. OC-SA	rs10240682	7	103466258	na	134	0
PY-EU vs. OC-SA	rs10282214	7	103469209	na	64	60
PY-EU vs. OC-SA	rs6465960	7	103497002	na	61	0
PY-EU vs. OC-SA	rs9969206	7	117205690	CTTNBP2	36	0
PY-EU vs. OC-SA	rs7778257	7	119399777	na	167	0
PY-EU vs. OC-SA	rs6963628	7	119428305	na	73	0
PY-EU vs. OC-SA	rs10270624	7	119473254	na	47	0
PY-EU vs. OC-SA	rs7804857	7	119553175	na	79	0
PY-EU vs. OC-SA	rs7792688	7	119615567	na	250	0
PY-EU vs. OC-SA	rs12533932	7	119727006	KCND2	56	0
PY-EU vs. OC-SA	rs2402526	7	119742821	KCND2	56	0
PY-EU vs. OC-SA	rs7810357	7	119812792	KCND2	772	0
PY-EU vs. OC-SA	rs6964344	7	120379172	ING3	106	0
PY-EU vs. OC-SA	rs2160010	7	120475699	FLJ21986	16	0
PY-EU vs. OC-SA	rs37908	7	122180133	CADPS2	66	0
PY-EU vs. OC-SA	rs2501449	7	122271289	CADPS2	56	0
PY-EU vs. OC-SA	rs4731429	7	127690775	na	3	0
PY-EU vs. OC-SA	rs7777234	7	131385686	na	7	0
PY-EU vs. OC-SA	rs11763352	7	131651881	na	126	0
PY-EU vs. OC-SA	rs1529764	7	131729953	na	39	0
PY-EU vs. OC-SA	rs2288970	7	131757493	na	59	61
PY-EU vs. OC-SA	rs277483	7	131770014	na	161	161
PY-EU vs. OC-SA	rs2241731	7	131772451	na	45	40
PY-EU vs. OC-SA	rs3752709	7	131774700	na	74	61
PY-EU vs. OC-SA	rs10488374	7	131780111	na	79	0
PY-EU vs. OC-SA	rs2241733	7	131780573	na	75	0
PY-EU vs. OC-SA	rs7789101	7	131877167	PLXNA4B	112	0
PY-EU vs. OC-SA	rs6963146	7	137222471	CREB3L2	104	0
PY-EU vs. OC-SA	rs273944	7	137233746	CREB3L2	43	0
PY-EU vs. OC-SA	rs4732278	7	137329885	CREB3L2	186	0
PY-EU vs. OC-SA	rs12535022	7	138422445	ZC3HAV1	118	0
PY-EU vs. OC-SA	rs6945954	7	138437735	ZC3HAV1	133	0
PY-EU vs. OC-SA	rs1181752	7	140788529	na	79	0
PY-EU vs. OC-SA	rs10808015	7	140817829	na	251	0
PY-EU vs. OC-SA	rs1494453	7	146028121	CNTNAP2	22	0
PY-EU vs. OC-SA	rs2159469	7	157298576	PTPRN2	219	0
PY-EU vs. OC-SA	rs6958049	7	157304122	PTPRN2	204	0
PY-EU vs. OC-SA	rs2978340	8	2613660	na	142	0
PY-EU vs. OC-SA	rs1460397	8	2959720	CSMD1	61	0
PY-EU vs. OC-SA	rs7842818	8	2969758	CSMD1	47	0
PY-EU vs. OC-SA	rs2617069	8	4426284	CSMD1	140	0
PY-EU vs. OC-SA	rs2440399	8	6313383	MCPH1	134	0
PY-EU vs. OC-SA	rs2515552	8	6453603	MCPH1	51	0
PY-EU vs. OC-SA	rs4841154	8	9352928	na	209	0
PY-EU vs. OC-SA	rs1484646	8	10065806	MSRA	39	0
PY-EU vs. OC-SA	rs6991853	8	10104567	MSRA	28	0
PY-EU vs. OC-SA	rs1565741	8	16799856	na	40	0
PY-EU vs. OC-SA	rs11780291	8	16802532	na	49	0
PY-EU vs. OC-SA	rs11203813	8	16810945	na	64	0
PY-EU vs. OC-SA	rs823616	8	16819341	na	304	0
PY-EU vs. OC-SA	rs4921950	8	18579854	PSD3	64	57
PY-EU vs. OC-SA	rs4921607	8	18583319	PSD3	449	0
PY-EU vs. OC-SA	rs13281313	8	20652188	na	59	0
PY-EU vs. OC-SA	rs984923	8	24690660	na	33	0
PY-EU vs. OC-SA	rs6981562	8	29864060	na	26	0
PY-EU vs. OC-SA	rs7816600	8	29911207	na	39	0
PY-EU vs. OC-SA	rs4352803	8	29937093	na	74	0
PY-EU vs. OC-SA	rs1401154	8	37145702	na	30	0
PY-EU vs. OC-SA	rs10504009	8	37458281	na	13	0
PY-EU vs. OC-SA	rs9642773	8	37463440	na	28	0
PY-EU vs. OC-SA	rs10098898	8	41266735	LOC727725,SFRP1	631	0
PY-EU vs. OC-SA	rs4873188	8	52320132	na	29	0
PY-EU vs. OC-SA	rs6992829	8	52352349	na	25	0
PY-EU vs. OC-SA	rs1431618	8	52517206	na	9	0
PY-EU vs. OC-SA	rs1011857	8	65300158	na	25	19
PY-EU vs. OC-SA	rs1371685	8	65360294	na	22	24
PY-EU vs. OC-SA	rs1371684	8	65360306	na	24	22
PY-EU vs. OC-SA	rs268594	8	71675684	TRAM1	22	0
PY-EU vs. OC-SA	rs268627	8	71723595	LACTB2	19	0
PY-EU vs. OC-SA	rs2546217	8	74331891	na	40	0
PY-EU vs. OC-SA	rs2546214	8	74334996	na	63	0
PY-EU vs. OC-SA	rs7017025	8	80211100	na	107	0
PY-EU vs. OC-SA	rs10504696	8	80223496	na	120	0
PY-EU vs. OC-SA	rs7832366	8	83185717	na	9	0
PY-EU vs. OC-SA	rs6989866	8	89442152	na	95	0
PY-EU vs. OC-SA	rs4573324	8	89748729	na	39	0
PY-EU vs. OC-SA	rs2068449	8	91370642	na	408	0
PY-EU vs. OC-SA	rs7832008	8	98427422	na	35	0
PY-EU vs. OC-SA	rs2247105	8	98429971	na	30	0
PY-EU vs. OC-SA	rs2679768	8	98430864	na	5	0
PY-EU vs. OC-SA	rs6990312	8	110671493	GOLSYN	48	0
PY-EU vs. OC-SA	rs17840659	8	111488705	na	32	34
PY-EU vs. OC-SA	rs4500059	8	111501581	na	27	23
PY-EU vs. OC-SA	rs7008113	8	111507831	na	23	0
PY-EU vs. OC-SA	rs4552876	8	111517603	na	24	0
PY-EU vs. OC-SA	rs16880715	8	111524781	na	35	0
PY-EU vs. OC-SA	rs4487731	8	111531312	na	448	0
PY-EU vs. OC-SA	rs6469315	8	111670075	na	297	0
PY-EU vs. OC-SA	rs7012481	8	111684141	na	284	0
PY-EU vs. OC-SA	rs7008570	8	111704941	na	38	0
PY-EU vs. OC-SA	rs2351182	8	111718551	na	27	0
PY-EU vs. OC-SA	rs2960157	8	116864717	na	11	0
PY-EU vs. OC-SA	rs11166832	8	139737214	COL22A1	53	0
PY-EU vs. OC-SA	rs2280880	8	143718931	na	44	0
PY-EU vs. OC-SA	rs10965206	9	219826	na	1	0
PY-EU vs. OC-SA	rs279903	9	952184	DMRT1	41	0
PY-EU vs. OC-SA	rs1016565	9	1022567	na	30	0
PY-EU vs. OC-SA	rs2279988	9	1032166	na	21	0
PY-EU vs. OC-SA	rs10809101	9	1048914	na	68	0
PY-EU vs. OC-SA	rs963565	9	1691112	na	75	0
PY-EU vs. OC-SA	rs496867	9	1702474	na	335	0
PY-EU vs. OC-SA	rs4740650	9	1788737	na	70	0
PY-EU vs. OC-SA	rs10117983	9	1805727	na	122	0
PY-EU vs. OC-SA	rs7030343	9	1940813	na	65	0
PY-EU vs. OC-SA	rs643429	9	3218700	RFX3	30	0
PY-EU vs. OC-SA	rs2986676	9	3317260	RFX3	27	0
PY-EU vs. OC-SA	rs10739056	9	4374289	na	81	0
PY-EU vs. OC-SA	rs7020418	9	5598427	na	141	0
PY-EU vs. OC-SA	rs7019813	9	10485679	na	163	0
PY-EU vs. OC-SA	rs7028926	9	10728492	na	110	0
PY-EU vs. OC-SA	rs928117	9	10729659	na	120	2
PY-EU vs. OC-SA	rs4961636	9	16054850	na	71	0
PY-EU vs. OC-SA	rs2383094	9	19390351	na	335	0
PY-EU vs. OC-SA	rs10757087	9	19730788	SLC24A2	26	0
PY-EU vs. OC-SA	rs10964547	9	20361299	MLLT3	212	0
PY-EU vs. OC-SA	rs1679018	9	22234280	na	31	0
PY-EU vs. OC-SA	rs7871143	9	22318194	na	26	0
PY-EU vs. OC-SA	rs4313236	9	22600531	na	23	0
PY-EU vs. OC-SA	rs2383246	9	22924249	na	47	0
PY-EU vs. OC-SA	rs7855775	9	36013395	na	336	0
PY-EU vs. OC-SA	rs6606438	9	44806024	na	434	0
PY-EU vs. OC-SA	rs10908023	9	67656950	na	374	0
PY-EU vs. OC-SA	rs7037278	9	75516400	na	257	0
PY-EU vs. OC-SA	rs2066259	9	80896445	na	73	0
PY-EU vs. OC-SA	rs1112275	9	80897269	na	63	0
PY-EU vs. OC-SA	rs4556160	9	81222172	na	152	0
PY-EU vs. OC-SA	rs3739581	9	83479115	TLE1	34	0
PY-EU vs. OC-SA	rs7024973	9	83663294	na	4	0
PY-EU vs. OC-SA	rs329200	9	86985046	na	67	0
PY-EU vs. OC-SA	rs2482709	9	93239380	na	67	0
PY-EU vs. OC-SA	rs4744045	9	93250033	na	34	0
PY-EU vs. OC-SA	rs1412470	9	93253823	na	36	0
PY-EU vs. OC-SA	rs1981030	9	93257122	na	26	0
PY-EU vs. OC-SA	rs4743884	9	94906308	C9orf89	19	0
PY-EU vs. OC-SA	rs7854368	9	113847462	SUSD1	99	0
PY-EU vs. OC-SA	rs10116039	9	115078001	CDC26,PRPF4	23	0
PY-EU vs. OC-SA	rs4091697	9	118694342	ASTN2	386	0
PY-EU vs. OC-SA	rs913783	9	125473924	DENND1A	25	0
PY-EU vs. OC-SA	rs10986088	9	125483780	DENND1A	18	0
PY-EU vs. OC-SA	rs7850520	9	125549627	DENND1A	37	0
PY-EU vs. OC-SA	rs2479106	9	125565033	DENND1A	57	0
PY-EU vs. OC-SA	rs2670139	9	125674076	DENND1A	64	0
PY-EU vs. OC-SA	rs1041205	9	126620825	na	136	135
PY-EU vs. OC-SA	rs4240425	9	129875601	SLC25A25	98	0
PY-EU vs. OC-SA	rs7854612	9	130040681	DNM1	71	0
PY-EU vs. OC-SA	rs15676	9	130611848	TBC1D13	22	0
PY-EU vs. OC-SA	rs2997922	9	130620565	ENDOG	16	0
PY-EU vs. OC-SA	rs2293966	9	130631653	C9orf114	48	0
PY-EU vs. OC-SA	rs12005009	9	132745575	ABL1	35	0
PY-EU vs. OC-SA	rs509646	9	134541834	GTF3C4	492	0
PY-EU vs. OC-SA	rs7860423	9	140075368	CACNA1B	15	29
PY-EU vs. OC-SA	rs4075060	10	5534093	na	44	0
PY-EU vs. OC-SA	rs944714	10	6515163	PRKCQ	19	0
PY-EU vs. OC-SA	rs1875594	10	11385351	CUGBP2	949	0
PY-EU vs. OC-SA	rs2801493	10	12520639	CAMK1D	159	0
PY-EU vs. OC-SA	rs7068881	10	16878872	RSU1	38	0
PY-EU vs. OC-SA	rs7916688	10	17207428	CUBN	22	0
PY-EU vs. OC-SA	rs1537352	10	19899096	C10orf112	197	0
PY-EU vs. OC-SA	rs1832309	10	24307596	na	158	0
PY-EU vs. OC-SA	rs2689208	10	30573666	na	245	0
PY-EU vs. OC-SA	rs2479351	10	32684905	na	101	0
PY-EU vs. OC-SA	rs2490527	10	32711123	na	37	0
PY-EU vs. OC-SA	rs4497319	10	49942478	C10orf72	130	0
PY-EU vs. OC-SA	rs2247911	10	59563936	na	36	0
PY-EU vs. OC-SA	rs7087773	10	71674460	na	38	0
PY-EU vs. OC-SA	rs7079524	10	72739498	na	14	0
PY-EU vs. OC-SA	rs885014	10	72997827	CDH23	66	0
PY-EU vs. OC-SA	rs1995666	10	82641381	na	57	0
PY-EU vs. OC-SA	rs2817656	10	98895213	SLIT1	18	0
PY-EU vs. OC-SA	rs2900713	10	108303229	na	2	0
PY-EU vs. OC-SA	rs7905723	10	108304419	na	37	0
PY-EU vs. OC-SA	rs1050755	10	112043589	SMNDC1	69	0
PY-EU vs. OC-SA	rs7088234	10	112920845	na	67	53
PY-EU vs. OC-SA	rs6585041	10	112932828	na	62	57
PY-EU vs. OC-SA	rs2039709	10	115052470	na	16	0
PY-EU vs. OC-SA	rs567584	10	115077271	na	23	0
PY-EU vs. OC-SA	rs572679	10	115083607	na	27	0
PY-EU vs. OC-SA	rs1570269	10	115277192	na	12	0
PY-EU vs. OC-SA	rs853577	10	119811326	na	605	290
PY-EU vs. OC-SA	rs2125669	10	127094126	na	82	0
PY-EU vs. OC-SA	rs1931725	10	129158517	na	290	0
PY-EU vs. OC-SA	rs1339520	10	130102560	na	81	0
PY-EU vs. OC-SA	rs3120134	10	132136144	na	104	0
PY-EU vs. OC-SA	rs4751209	10	132181958	na	50	0
PY-EU vs. OC-SA	rs4397751	10	132473446	na	28	0
PY-EU vs. OC-SA	rs7897741	10	134133865	na	287	0
PY-EU vs. OC-SA	rs2237888	11	2789481	KCNQ1	156	0
PY-EU vs. OC-SA	rs7104032	11	4179554	na	78	0
PY-EU vs. OC-SA	rs10741780	11	19556547	na	657	638
PY-EU vs. OC-SA	rs10766573	11	19566520	na	71	74
PY-EU vs. OC-SA	rs10741784	11	19582516	na	81	96
PY-EU vs. OC-SA	rs1487214	11	19588715	na	311	308
PY-EU vs. OC-SA	rs10741789	11	19652991	na	20	18
PY-EU vs. OC-SA	rs2012651	11	19656753	na	56	0
PY-EU vs. OC-SA	rs7479049	11	20390059	PRMT3	81	0
PY-EU vs. OC-SA	rs10734291	11	20391684	PRMT3	93	0
PY-EU vs. OC-SA	rs7114918	11	20434885	PRMT3	78	0
PY-EU vs. OC-SA	rs1036923	11	20445029	PRMT3	39	0
PY-EU vs. OC-SA	rs10741842	11	20479491	PRMT3	61	0
PY-EU vs. OC-SA	rs1429780	11	20816950	NELL1	54	0
PY-EU vs. OC-SA	rs7114377	11	20824056	NELL1	33	0
PY-EU vs. OC-SA	rs7927476	11	20827312	NELL1	86	75
PY-EU vs. OC-SA	rs1346690	11	20827819	NELL1	76	0
PY-EU vs. OC-SA	rs10766743	11	20881615	NELL1	35	0
PY-EU vs. OC-SA	rs10833635	11	21786940	na	43	0
PY-EU vs. OC-SA	rs10834974	11	26379553	TMEM16C	28	0
PY-EU vs. OC-SA	rs7113405	11	26395062	TMEM16C	21	0
PY-EU vs. OC-SA	rs326765	11	29562842	LOC729560	672	0
PY-EU vs. OC-SA	rs4755528	11	39844343	na	16	0
PY-EU vs. OC-SA	rs6485153	11	39871624	na	32	0
PY-EU vs. OC-SA	rs4755534	11	39888694	na	58	0
PY-EU vs. OC-SA	rs1514815	11	41981821	na	12	0
PY-EU vs. OC-SA	rs4755957	11	45058114	na	126	0
PY-EU vs. OC-SA	rs9651726	11	60825934	DDB1,LOC652707	25	0
PY-EU vs. OC-SA	rs10896371	11	68353680	CPT1A	22	0
PY-EU vs. OC-SA	rs10750836	11	68572099	TPCN2	331	0
PY-EU vs. OC-SA	rs3741163	11	71752451	CLPB	31	0
PY-EU vs. OC-SA	rs10793030	11	71849745	na	26	0
PY-EU vs. OC-SA	rs2198254	11	79820709	na	53	0
PY-EU vs. OC-SA	rs3802894	11	83837193	DLG2	19	0
PY-EU vs. OC-SA	rs905646	11	87993450	GRM5	306	0
PY-EU vs. OC-SA	rs11020772	11	88018980	GRM5	211	0
PY-EU vs. OC-SA	rs7483764	11	88023261	GRM5	300	0
PY-EU vs. OC-SA	rs7128594	11	96075625	na	16	22
PY-EU vs. OC-SA	rs1866535	11	96081658	na	17	0
PY-EU vs. OC-SA	rs1866536	11	96081702	na	164	0
PY-EU vs. OC-SA	rs11224280	11	96358989	na	47	0
PY-EU vs. OC-SA	rs3824933	11	100824741	na	19	0
PY-EU vs. OC-SA	rs7931399	11	100828343	TRPC6	28	0
PY-EU vs. OC-SA	rs4396256	11	100836017	TRPC6	10	0
PY-EU vs. OC-SA	rs10895900	11	105444661	KBTBD3	50	0
PY-EU vs. OC-SA	rs10895904	11	105475344	na	47	0
PY-EU vs. OC-SA	rs11226922	11	105480535	na	51	0
PY-EU vs. OC-SA	rs563816	11	105736354	na	40	0
PY-EU vs. OC-SA	rs618453	11	105738304	na	55	0
PY-EU vs. OC-SA	rs638300	11	105750678	na	50	0
PY-EU vs. OC-SA	rs1728909	11	106868669	na	1	0
PY-EU vs. OC-SA	rs328286	11	109901979	na	21	0
PY-EU vs. OC-SA	rs11601321	11	124698806	na	24	30
PY-EU vs. OC-SA	rs607980	11	125507893	na	107	0
PY-EU vs. OC-SA	rs3734075	11	129287006	PRDM10	48	0
PY-EU vs. OC-SA	rs7949651	11	129337480	PRDM10	357	0
PY-EU vs. OC-SA	rs7938683	11	129352189	PRDM10	118	0
PY-EU vs. OC-SA	rs478745	11	129565427	ST14	22	0
PY-EU vs. OC-SA	rs7967165	12	950268	na	34	0
PY-EU vs. OC-SA	rs11061702	12	1307115	ERC1	22	0
PY-EU vs. OC-SA	rs2283326	12	2569753	CACNA1C	15	0
PY-EU vs. OC-SA	rs10848765	12	3011756	TEAD4	16	0
PY-EU vs. OC-SA	rs4766030	12	3020435	TEAD4	36	0
PY-EU vs. OC-SA	rs2080125	12	7618811	na	62	0
PY-EU vs. OC-SA	rs7965166	12	7621453	na	58	0
PY-EU vs. OC-SA	rs10845353	12	11476647	hCG_1655019	110	0
PY-EU vs. OC-SA	rs11829666	12	15742732	EPS8	6	0
PY-EU vs. OC-SA	rs10846246	12	15942757	STRAP	62	0
PY-EU vs. OC-SA	rs9805106	12	19263624	PLEKHA5	51	0
PY-EU vs. OC-SA	rs10743315	12	19360345	PLEKHA5	31	0
PY-EU vs. OC-SA	rs7975017	12	26320060	na	97	0
PY-EU vs. OC-SA	rs4964060	12	27424634	ARNTL2	28	0
PY-EU vs. OC-SA	rs1965728	12	30327454	na	29	0
PY-EU vs. OC-SA	rs4931344	12	30531885	na	21	0
PY-EU vs. OC-SA	rs12303020	12	30535668	na	35	0
PY-EU vs. OC-SA	rs4759058	12	52625319	HOXC13	16	0
PY-EU vs. OC-SA	rs971779	12	64468722	na	32	24
PY-EU vs. OC-SA	rs11834900	12	64533318	HMGA2	34	0
PY-EU vs. OC-SA	rs1358274	12	77184223	na	104	7
PY-EU vs. OC-SA	rs795943	12	77187598	na	25	26
PY-EU vs. OC-SA	rs2053872	12	78698368	PPP1R12A	140	0
PY-EU vs. OC-SA	rs2698261	12	78790503	PPP1R12A	135	0
PY-EU vs. OC-SA	rs10862027	12	78918596	na	34	0
PY-EU vs. OC-SA	rs4146751	12	86860091	na	26	0
PY-EU vs. OC-SA	rs4435086	12	86868608	na	24	0
PY-EU vs. OC-SA	rs2694405	12	104489159	na	196	0
PY-EU vs. OC-SA	rs12371128	12	104765747	na	194	0
PY-EU vs. OC-SA	rs3858620	12	113413635	na	43	0
PY-EU vs. OC-SA	rs7978143	12	113421296	na	33	0
PY-EU vs. OC-SA	rs838327	12	113423671	na	44	0
PY-EU vs. OC-SA	rs10161338	12	114349686	na	65	0
PY-EU vs. OC-SA	rs697887	12	114799159	na	23	0
PY-EU vs. OC-SA	rs11610226	12	115470017	na	274	0
PY-EU vs. OC-SA	rs7960136	12	124749834	na	91	0
PY-EU vs. OC-SA	rs10846979	12	124850051	na	211	0
PY-EU vs. OC-SA	rs10847334	12	126422640	na	94	0
PY-EU vs. OC-SA	rs2174413	12	126431129	na	147	0
PY-EU vs. OC-SA	rs7978095	12	126799314	na	63	0
PY-EU vs. OC-SA	rs10744436	12	128931769	TMEM132D	80	0
PY-EU vs. OC-SA	rs7136649	12	131164948	EP400NL	13	0
PY-EU vs. OC-SA	rs11246932	12	131176266	EP400NL,LOC728308	41	0
PY-EU vs. OC-SA	rs6598202	12	131183760	na	19	0
PY-EU vs. OC-SA	rs9511997	13	18669535	na	10	0
PY-EU vs. OC-SA	rs9508901	13	19275448	na	227	0
PY-EU vs. OC-SA	rs3783036	13	19334506	ZMYM5,LOC400099	374	0
PY-EU vs. OC-SA	rs4770024	13	19893731	CRYL1	17	0
PY-EU vs. OC-SA	rs9506487	13	19896937	CRYL1	26	0
PY-EU vs. OC-SA	rs7992211	13	27589097	na	31	0
PY-EU vs. OC-SA	rs1360485	13	29929884	na	17	0
PY-EU vs. OC-SA	rs9563673	13	33137526	na	523	499
PY-EU vs. OC-SA	rs11147593	13	35378042	DCLK1	28	0
PY-EU vs. OC-SA	rs2323883	13	38017082	na	80	0
PY-EU vs. OC-SA	rs2805087	13	38082033	na	56	0
PY-EU vs. OC-SA	rs4943605	13	38298169	FREM2	12	0
PY-EU vs. OC-SA	rs7335309	13	38338312	FREM2	7	0
PY-EU vs. OC-SA	rs6563828	13	39856163	na	31	0
PY-EU vs. OC-SA	rs2152865	13	44249560	na	152	0
PY-EU vs. OC-SA	rs797498	13	50170085	na	171	0
PY-EU vs. OC-SA	rs7324330	13	66646521	PCDH9	31	0
PY-EU vs. OC-SA	rs4338667	13	67094362	na	300	0
PY-EU vs. OC-SA	rs2104388	13	73573574	KLF12,LOC730245	177	0
PY-EU vs. OC-SA	rs4885151	13	73595857	KLF12,LOC730245	181	0
PY-EU vs. OC-SA	rs7338571	13	73731874	na	29	0
PY-EU vs. OC-SA	rs2026514	13	80644047	na	80	0
PY-EU vs. OC-SA	rs7335222	13	88816393	na	467	0
PY-EU vs. OC-SA	rs7988257	13	92263540	GPC5	31	0
PY-EU vs. OC-SA	rs4488317	13	103141563	na	16	0
PY-EU vs. OC-SA	rs945597	13	103348161	na	23	0
PY-EU vs. OC-SA	rs7981779	13	105726750	na	27	0
PY-EU vs. OC-SA	rs288715	13	106249643	na	26	0
PY-EU vs. OC-SA	rs7328053	13	108099789	MYO16	89	0
PY-EU vs. OC-SA	rs1926533	13	108100865	MYO16	103	0
PY-EU vs. OC-SA	rs8013143	14	22564117	PSMB5	31	0
PY-EU vs. OC-SA	rs941718	14	22564888	PSMB5	35	0
PY-EU vs. OC-SA	rs4982736	14	22698306	SLC7A8	21	0
PY-EU vs. OC-SA	rs727926	14	23053169	na	52	0
PY-EU vs. OC-SA	rs1951688	14	31886512	AKAP6	58	0
PY-EU vs. OC-SA	rs12878176	14	32431799	na	37	0
PY-EU vs. OC-SA	rs10483447	14	33018997	NPAS3	63	0
PY-EU vs. OC-SA	rs7146642	14	33293783	NPAS3	87	0
PY-EU vs. OC-SA	rs1958578	14	33870574	na	265	0
PY-EU vs. OC-SA	rs1958579	14	33870654	na	337	0
PY-EU vs. OC-SA	rs2415888	14	45064383	na	54	0
PY-EU vs. OC-SA	rs10132597	14	45113932	na	39	0
PY-EU vs. OC-SA	rs4906583	14	45134477	na	81	0
PY-EU vs. OC-SA	rs4906584	14	45149027	na	62	0
PY-EU vs. OC-SA	rs12147827	14	45850950	na	33	0
PY-EU vs. OC-SA	rs8017565	14	57413359	na	39	0
PY-EU vs. OC-SA	rs959728	14	61003771	PRKCH	52	0
PY-EU vs. OC-SA	rs7146249	14	62817387	RHOJ	21	19
PY-EU vs. OC-SA	rs10145908	14	62823082	RHOJ	23	0
PY-EU vs. OC-SA	rs2012961	14	62828943	na	28	0
PY-EU vs. OC-SA	rs8005319	14	62892274	na	56	0
PY-EU vs. OC-SA	rs6573513	14	62925513	PPP2R5E	70	0
PY-EU vs. OC-SA	rs743221	14	62927561	PPP2R5E	58	0
PY-EU vs. OC-SA	rs7144210	14	62940684	PPP2R5E	157	0
PY-EU vs. OC-SA	rs10140679	14	62971047	PPP2R5E	20	0
PY-EU vs. OC-SA	rs7146069	14	62979091	PPP2R5E	33	0
PY-EU vs. OC-SA	rs11158491	14	62980858	PPP2R5E	32	0
PY-EU vs. OC-SA	rs3783741	14	62991425	PPP2R5E	26	0
PY-EU vs. OC-SA	rs1012145	14	63009835	PPP2R5E	36	0
PY-EU vs. OC-SA	rs11158493	14	63023275	PPP2R5E	42	0
PY-EU vs. OC-SA	rs1255718	14	63078562	PPP2R5E	50	0
PY-EU vs. OC-SA	rs2361289	14	75979923	ESRRB	147	0
PY-EU vs. OC-SA	rs987644	14	78313798	NRXN3	12	0
PY-EU vs. OC-SA	rs154333	14	78469349	NRXN3	18	0
PY-EU vs. OC-SA	rs31437	14	78485066	NRXN3	15	0
PY-EU vs. OC-SA	rs154343	14	78494130	NRXN3	17	23
PY-EU vs. OC-SA	rs11159708	14	85084278	FLRT2	246	0
PY-EU vs. OC-SA	rs8008589	14	89139678	na	23	0
PY-EU vs. OC-SA	rs8015314	14	94508981	na	168	0
PY-EU vs. OC-SA	rs2719921	15	23042723	na	479	0
PY-EU vs. OC-SA	rs1635168	15	26208861	HERC2	22	0
PY-EU vs. OC-SA	rs11070544	15	27176316	APBA2	45	0
PY-EU vs. OC-SA	rs6495814	15	27711033	na	22	0
PY-EU vs. OC-SA	rs12914224	15	32902602	na	35	7
PY-EU vs. OC-SA	rs7164151	15	33056488	ZNF770	52	0
PY-EU vs. OC-SA	rs2598464	15	40084384	PLA2G4E	26	0
PY-EU vs. OC-SA	rs2620386	15	40231902	PLA2G4F	40	0
PY-EU vs. OC-SA	rs1619030	15	40246326	VPS39	169	0
PY-EU vs. OC-SA	rs622442	15	40250969	VPS39	159	0
PY-EU vs. OC-SA	rs1679012	15	40315968	TMEM87A	88	0
PY-EU vs. OC-SA	rs2854439	15	43146138	SORD	53	0
PY-EU vs. OC-SA	rs2124132	15	45340790	na	163	0
PY-EU vs. OC-SA	rs1878186	15	46295692	SLC12A1	172	165
PY-EU vs. OC-SA	rs2008691	15	49335602	CYP19A1	23	0
PY-EU vs. OC-SA	rs2440359	15	50919088	na	123	0
PY-EU vs. OC-SA	rs1899727	15	50927337	na	120	0
PY-EU vs. OC-SA	rs1873813	15	51082540	na	34	0
PY-EU vs. OC-SA	rs1392857	15	51101682	na	34	0
PY-EU vs. OC-SA	rs2414418	15	53596952	na	12	0
PY-EU vs. OC-SA	rs1559776	15	55746920	Gcom1	46	0
PY-EU vs. OC-SA	rs261337	15	56522741	LIPC	235	0
PY-EU vs. OC-SA	rs6494217	15	58781284	RORA	25	0
PY-EU vs. OC-SA	rs1387386	15	60998928	na	49	0
PY-EU vs. OC-SA	rs8026167	15	61001259	na	33	0
PY-EU vs. OC-SA	rs170781	15	64120154	MEGF11	137	0
PY-EU vs. OC-SA	rs4777126	15	67294514	GLCE	22	16
PY-EU vs. OC-SA	rs12903941	15	71341597	NEO1	11	0
PY-EU vs. OC-SA	rs1564784	15	72332201	na	181	0
PY-EU vs. OC-SA	rs2959823	15	74200584	C15orf27	75	0
PY-EU vs. OC-SA	rs7183668	15	77043213	RASGRF1	100	0
PY-EU vs. OC-SA	rs2672092	15	79657675	na	88	0
PY-EU vs. OC-SA	rs6495605	15	79723534	na	87	0
PY-EU vs. OC-SA	rs6496865	15	90135760	na	57	0
PY-EU vs. OC-SA	rs3784651	15	92726277	MCTP2	88	0
PY-EU vs. OC-SA	rs748095	15	93625432	LOC400456	41	0
PY-EU vs. OC-SA	rs7171955	15	93742952	na	16	0
PY-EU vs. OC-SA	rs2654976	15	97367760	na	40	0
PY-EU vs. OC-SA	rs2667672	16	1476381	LOC390667	49	0
PY-EU vs. OC-SA	rs11860440	16	1697619	MAPK8IP3	17	0
PY-EU vs. OC-SA	rs1742454	16	1879379	na	24	0
PY-EU vs. OC-SA	rs9938257	16	4322608	GLIS2	84	0
PY-EU vs. OC-SA	rs3747579	16	4385328	CORO7	125	0
PY-EU vs. OC-SA	rs3747581	16	4402620	CORO7	59	0
PY-EU vs. OC-SA	rs4781504	16	9193666	na	48	0
PY-EU vs. OC-SA	rs6498267	16	12155881	LOC92017	43	0
PY-EU vs. OC-SA	rs4782279	16	19666508	IQCK	20	0
PY-EU vs. OC-SA	rs8053136	16	19674630	IQCK	56	0
PY-EU vs. OC-SA	rs8050872	16	19711347	IQCK	23	0
PY-EU vs. OC-SA	rs7191766	16	22043646	na	19	0
PY-EU vs. OC-SA	rs4783449	16	22149769	EEF2K	61	0
PY-EU vs. OC-SA	rs2290829	16	22203987	EEF2K	621	0
PY-EU vs. OC-SA	rs9931113	16	23197340	na	27	0
PY-EU vs. OC-SA	rs11859822	16	28902558	SPNS1,LAT	306	298
PY-EU vs. OC-SA	rs1872667	16	29206878	na	34	0
PY-EU vs. OC-SA	rs4479245	16	31511273	na	15	6
PY-EU vs. OC-SA	rs6500253	16	46639397	na	23	0
PY-EU vs. OC-SA	rs546791	16	46658136	na	704	0
PY-EU vs. OC-SA	rs152655	16	48001470	na	22	0
PY-EU vs. OC-SA	rs8062570	16	49414343	na	84	0
PY-EU vs. OC-SA	rs4785229	16	49430496	na	79	0
PY-EU vs. OC-SA	rs2388230	16	52177986	na	58	0
PY-EU vs. OC-SA	rs5005161	16	52256177	RPGRIP1L	94	0
PY-EU vs. OC-SA	rs2388256	16	52336506	FTO	26	0
PY-EU vs. OC-SA	rs2540781	16	52645360	FTO	97	0
PY-EU vs. OC-SA	rs940214	16	52648579	FTO	63	0
PY-EU vs. OC-SA	rs2540769	16	52665463	FTO	97	0
PY-EU vs. OC-SA	rs1825730	16	53679922	na	11	0
PY-EU vs. OC-SA	rs8058677	16	60525806	CDH8	36	0
PY-EU vs. OC-SA	rs8059496	16	67673150	na	74	0
PY-EU vs. OC-SA	rs7203264	16	67682470	na	28	0
PY-EU vs. OC-SA	rs3785074	16	67964487	TERF2	31	0
PY-EU vs. OC-SA	rs1429430	16	71294978	na	263	0
PY-EU vs. OC-SA	rs9925261	16	71485034	ZFHX3	4	0
PY-EU vs. OC-SA	rs9932434	16	72567803	na	17	0
PY-EU vs. OC-SA	rs2526059	16	72610057	na	1	0
PY-EU vs. OC-SA	rs9925796	16	77327289	na	143	0
PY-EU vs. OC-SA	rs7192960	16	77974064	na	55	7
PY-EU vs. OC-SA	rs4547344	16	78341778	LOC440389	200	0
PY-EU vs. OC-SA	rs4603571	16	78354757	LOC440389	50	0
PY-EU vs. OC-SA	rs4889026	16	78365616	na	44	45
PY-EU vs. OC-SA	rs4243183	16	78386276	na	18	0
PY-EU vs. OC-SA	rs1134715	16	78390258	na	22	29
PY-EU vs. OC-SA	rs4889035	16	78391762	na	23	19
PY-EU vs. OC-SA	rs4299168	16	78392929	na	27	30
PY-EU vs. OC-SA	rs6564708	16	78400537	na	31	20
PY-EU vs. OC-SA	rs2967391	16	80787893	na	88	0
PY-EU vs. OC-SA	rs13332255	16	81528449	CDH13	69	0
PY-EU vs. OC-SA	rs7196826	16	81657208	CDH13	81	0
PY-EU vs. OC-SA	rs2550415	16	83222428	na	63	0
PY-EU vs. OC-SA	rs11117273	16	86041339	ZCCHC14	150	0
PY-EU vs. OC-SA	rs9936994	16	86060316	ZCCHC14	163	0
PY-EU vs. OC-SA	rs8051279	16	86065108	ZCCHC14	80	0
PY-EU vs. OC-SA	rs7208188	17	113034	RPH3AL	8	0
PY-EU vs. OC-SA	rs2293067	17	1496856	RILP	28	0
PY-EU vs. OC-SA	rs1805453	17	5326122	DERL2	17	0
PY-EU vs. OC-SA	rs17803335	17	6200853	na	216	0
PY-EU vs. OC-SA	rs1588751	17	6211340	na	84	0
PY-EU vs. OC-SA	rs1078643	17	10647966	na	114	0
PY-EU vs. OC-SA	rs2674948	17	13010746	na	9	0
PY-EU vs. OC-SA	rs12452203	17	13228570	na	25	0
PY-EU vs. OC-SA	rs7225831	17	17267330	na	17	0
PY-EU vs. OC-SA	rs4315391	17	17270453	na	62	0
PY-EU vs. OC-SA	rs8065874	17	18216572	na	2	0
PY-EU vs. OC-SA	rs2053670	17	32540809	ACACA	100	0
PY-EU vs. OC-SA	rs7215365	17	32550026	ACACA	97	0
PY-EU vs. OC-SA	rs7208613	17	32563948	ACACA	93	0
PY-EU vs. OC-SA	rs7216086	17	34962948	na	46	0
PY-EU vs. OC-SA	rs7212972	17	37234345	NT5C3L	24	0
PY-EU vs. OC-SA	rs4796729	17	37295202	ACLY	22	0
PY-EU vs. OC-SA	rs11652600	17	37404105	DNAJC7	26	0
PY-EU vs. OC-SA	rs4796754	17	37407211	DNAJC7	27	0
PY-EU vs. OC-SA	rs2074158	17	37510689	DHX58	23	0
PY-EU vs. OC-SA	rs7226263	17	42170068	NSF	197	0
PY-EU vs. OC-SA	rs12449655	17	48522832	na	19	0
PY-EU vs. OC-SA	rs2331543	17	48539891	na	21	0
PY-EU vs. OC-SA	rs998346	17	48619766	na	25	0
PY-EU vs. OC-SA	rs1859360	17	48632057	na	27	0
PY-EU vs. OC-SA	rs2110202	17	51837308	ANKFN1	46	0
PY-EU vs. OC-SA	rs11652033	17	51927011	na	25	0
PY-EU vs. OC-SA	rs10515130	17	51933919	na	42	0
PY-EU vs. OC-SA	rs8069636	17	51943898	na	44	51
PY-EU vs. OC-SA	rs1003395	17	52051231	na	53	0
PY-EU vs. OC-SA	rs11079395	17	55560921	na	167	0
PY-EU vs. OC-SA	rs3760332	17	55863400	C17orf64	29	0
PY-EU vs. OC-SA	rs11655511	17	56642051	BCAS3	51	0
PY-EU vs. OC-SA	rs3785864	17	56659394	BCAS3	45	0
PY-EU vs. OC-SA	rs8074112	17	57839632	EFCAB3	119	0
PY-EU vs. OC-SA	rs2109265	17	58307001	na	71	0
PY-EU vs. OC-SA	rs918077	17	67676973	na	33	0
PY-EU vs. OC-SA	rs7219493	17	70555783	KCTD2	27	0
PY-EU vs. OC-SA	rs4485425	17	71279032	na	36	0
PY-EU vs. OC-SA	rs2125345	17	71293786	UNK	32	0
PY-EU vs. OC-SA	rs9302994	17	71418529	FBF1	26	0
PY-EU vs. OC-SA	rs3682	17	71453745	ACOX1	42	0
PY-EU vs. OC-SA	rs8065144	17	71471452	ACOX1	56	0
PY-EU vs. OC-SA	rs9911606	17	72059595	na	31	0
PY-EU vs. OC-SA	rs2376999	17	74402459	TIMP2,LOC732206	50	0
PY-EU vs. OC-SA	rs8083731	18	11413536	na	74	0
PY-EU vs. OC-SA	rs4800343	18	17857011	na	55	0
PY-EU vs. OC-SA	rs4800353	18	17908135	na	80	0
PY-EU vs. OC-SA	rs11082067	18	18502796	na	146	0
PY-EU vs. OC-SA	rs418421	18	18541441	na	23	0
PY-EU vs. OC-SA	rs299247	18	18543770	na	15	0
PY-EU vs. OC-SA	rs299235	18	18563230	na	133	0
PY-EU vs. OC-SA	rs1994419	18	19919222	C18orf17	55	0
PY-EU vs. OC-SA	rs4043681	18	19921243	C18orf17	123	0
PY-EU vs. OC-SA	rs4043684	18	19922062	C18orf17	100	0
PY-EU vs. OC-SA	rs966304	18	25107785	na	56	0
PY-EU vs. OC-SA	rs3852850	18	25702254	na	187	0
PY-EU vs. OC-SA	rs9954856	18	28009142	na	190	0
PY-EU vs. OC-SA	rs9945133	18	28022607	MEP1B	4	0
PY-EU vs. OC-SA	rs1037753	18	28210472	FAM59A	74	0
PY-EU vs. OC-SA	rs16963287	18	28221331	FAM59A	23	0
PY-EU vs. OC-SA	rs1380085	18	28282875	FAM59A	40	0
PY-EU vs. OC-SA	rs16963381	18	28284603	FAM59A	90	0
PY-EU vs. OC-SA	rs630228	18	35535412	LOC647946	285	0
PY-EU vs. OC-SA	rs9955175	18	36090984	na	38	0
PY-EU vs. OC-SA	rs7504246	18	36104003	na	48	0
PY-EU vs. OC-SA	rs788433	18	36783969	na	41	0
PY-EU vs. OC-SA	rs688813	18	36784354	na	49	0
PY-EU vs. OC-SA	rs635956	18	36802781	na	45	0
PY-EU vs. OC-SA	rs10502786	18	38192012	na	15	0
PY-EU vs. OC-SA	rs11082588	18	43244969	na	154	0
PY-EU vs. OC-SA	rs1036348	18	43252022	na	160	0
PY-EU vs. OC-SA	rs7505051	18	43255771	na	127	0
PY-EU vs. OC-SA	rs470276	18	72872188	MBP	190	0
PY-EU vs. OC-SA	rs350886	19	4041113	MAP2K2	208	0
PY-EU vs. OC-SA	rs7260343	19	9178125	na	28	0
PY-EU vs. OC-SA	rs6511901	19	13888652	CC2D1A	32	0
PY-EU vs. OC-SA	rs2305776	19	13890269	CC2D1A	76	0
PY-EU vs. OC-SA	rs2385089	19	18411434	na	50	0
PY-EU vs. OC-SA	rs2278238	19	18437484	ELL	42	0
PY-EU vs. OC-SA	rs8113699	19	22656028	ZNF492	69	0
PY-EU vs. OC-SA	rs12980509	19	22744786	ZNF99	103	0
PY-EU vs. OC-SA	rs10424881	19	34854335	PLEKHF1	20	0
PY-EU vs. OC-SA	rs2867024	19	35488438	na	43	0
PY-EU vs. OC-SA	rs7248284	19	35491643	na	86	0
PY-EU vs. OC-SA	rs2377081	19	38835881	na	238	0
PY-EU vs. OC-SA	rs4803471	19	46655589	na	21	0
PY-EU vs. OC-SA	rs11672691	19	46677427	na	20	0
PY-EU vs. OC-SA	rs717225	19	47085126	ARHGEF1	948	945
PY-EU vs. OC-SA	rs12609870	19	54921456	na	258	0
PY-EU vs. OC-SA	rs2445830	19	55606425	POLD1	43	0
PY-EU vs. OC-SA	rs2445837	19	55613084	POLD1,SPIB	32	0
PY-EU vs. OC-SA	rs7250000	19	56578734	LIM2	40	0
PY-EU vs. OC-SA	rs919779	19	57130159	ZNF613	98	0
PY-EU vs. OC-SA	rs6140448	20	785800	na	23	0
PY-EU vs. OC-SA	rs486344	20	887161	RSPO4	28	0
PY-EU vs. OC-SA	rs6107904	20	6918514	na	26	12
PY-EU vs. OC-SA	rs7270608	20	6926623	na	67	0
PY-EU vs. OC-SA	rs6077138	20	7000333	na	81	0
PY-EU vs. OC-SA	rs6039505	20	9495288	PAK7	25	0
PY-EU vs. OC-SA	rs4814097	20	12306420	na	96	0
PY-EU vs. OC-SA	rs1797022	20	24000857	na	26	0
PY-EU vs. OC-SA	rs6049931	20	24666729	na	140	0
PY-EU vs. OC-SA	rs2424664	20	24682936	na	65	0
PY-EU vs. OC-SA	rs10359	20	33563203	CEP250	63	0
PY-EU vs. OC-SA	rs6058388	20	34035260	C20orf152	10	0
PY-EU vs. OC-SA	rs2794382	20	34077065	C20orf152	76	0
PY-EU vs. OC-SA	rs4812858	20	42782631	WISP2	19	0
PY-EU vs. OC-SA	rs914828	20	45050724	EYA2	79	68
PY-EU vs. OC-SA	rs2426047	20	45998430	na	19	0
PY-EU vs. OC-SA	rs2426053	20	46000192	na	18	19
PY-EU vs. OC-SA	rs228832	20	49493555	NFATC2	45	0
PY-EU vs. OC-SA	rs6063838	20	50641687	na	121	132
PY-EU vs. OC-SA	rs1884000	20	50643665	na	132	124
PY-EU vs. OC-SA	rs6064163	20	53130729	na	17	0
PY-EU vs. OC-SA	rs4324374	20	53142032	na	27	0
PY-EU vs. OC-SA	rs4811573	20	53147091	na	22	0
PY-EU vs. OC-SA	rs6064166	20	53150593	na	18	0
PY-EU vs. OC-SA	rs6024203	20	53567776	na	15	0
PY-EU vs. OC-SA	rs6098654	20	53568283	na	6	0
PY-EU vs. OC-SA	rs6024213	20	53573746	na	20	15
PY-EU vs. OC-SA	rs6025134	20	54761343	na	199	0
PY-EU vs. OC-SA	rs6014814	20	54762783	na	221	0
PY-EU vs. OC-SA	rs6027478	20	58300284	na	24	0
PY-EU vs. OC-SA	rs16983775	20	58304534	na	30	0
PY-EU vs. OC-SA	rs6071404	20	58897027	na	126	0
PY-EU vs. OC-SA	rs237655	20	58957235	na	246	0
PY-EU vs. OC-SA	rs6061612	20	59540967	CDH4	72	0
PY-EU vs. OC-SA	rs6061961	20	60035259	TAF4	3	0
PY-EU vs. OC-SA	rs387098	20	61625038	na	40	33
PY-EU vs. OC-SA	rs310644	20	61629948	PTK6	51	65
PY-EU vs. OC-SA	rs9979231	21	21399144	NCAM2	22	0
PY-EU vs. OC-SA	rs8131621	21	37173428	HLCS	18	0
PY-EU vs. OC-SA	rs7278856	21	41520757	BACE2	28	0
PY-EU vs. OC-SA	rs441810	21	41620777	FAM3B	46	0
PY-EU vs. OC-SA	rs7278220	21	41647250	FAM3B	49	0
PY-EU vs. OC-SA	rs220245	21	42332241	na	27	0
PY-EU vs. OC-SA	rs233270	21	44865585	C21orf29	30	0
PY-EU vs. OC-SA	rs8126757	21	45672710	COL18A1	126	0
PY-EU vs. OC-SA	rs6518680	22	16226951	na	36	0
PY-EU vs. OC-SA	rs9618000	22	16233714	na	67	0
PY-EU vs. OC-SA	rs5992709	22	16296547	na	38	0
PY-EU vs. OC-SA	rs5746398	22	16309926	na	6	0
PY-EU vs. OC-SA	rs738792	22	22451378	MMP11	17	0
PY-EU vs. OC-SA	rs5760023	22	22468301	SMARCB1	13	0
PY-EU vs. OC-SA	rs738796	22	22472523	SMARCB1	28	0
PY-EU vs. OC-SA	rs5760066	22	22517820	na	3	0
PY-EU vs. OC-SA	rs3859874	22	24539678	MYO18B	49	0
PY-EU vs. OC-SA	rs3859876	22	24551770	MYO18B	119	0
PY-EU vs. OC-SA	rs2331162	22	24552505	MYO18B	103	0
PY-EU vs. OC-SA	rs528686	22	26038852	na	75	0
PY-EU vs. OC-SA	rs6006405	22	28950627	na	76	0
PY-EU vs. OC-SA	rs2283904	22	32130119	LARGE	178	0
PY-EU vs. OC-SA	rs5994737	22	32134804	LARGE	191	0
PY-EU vs. OC-SA	rs1573703	22	36157657	na	41	0
PY-EU vs. OC-SA	rs4821667	22	36160027	na	40	0
PY-EU vs. OC-SA	rs9611324	22	39111108	SGSM3	39	0
PY-EU vs. OC-SA	rs5751080	22	40066213	ZC3H7B	11	0
PY-EU vs. OC-SA	rs4820437	22	40091236	na	10	0
PY-EU vs. OC-SA	rs5758314	22	40092469	na	17	0
PY-EU vs. OC-SA	rs202654	22	40170980	TOB2	15	0
PY-EU vs. OC-SA	rs5996039	22	40311903	PMM1	30	0
PY-EU vs. OC-SA	rs8139993	22	40325281	D15Wsu75e	25	0
PY-EU vs. OC-SA	rs4823209	22	42992777	KIAA1644	17	0
PY-EU vs. OC-SA	rs6007154	22	43260632	na	16	0
PY-EU vs. OC-SA	rs136037	22	44638544	na	396	0
PY-EU vs. OC-SA	rs8141309	22	46743936	na	27	0
PY-EU vs. OC-SA	rs6007777	22	46765602	na	36	0
PY-EU vs. OC-SA	rs763124	22	48334254	FLJ44385	17	0
PY-EU vs. OC-SA	rs10854874	22	48370692	na	3	0
PY-EU vs. OC-SA	rs6009870	22	48540686	na	64	0
PY-EU vs. OC-SA	rs9616816	22	49470371	SHANK3	16	0
PY-WA vs. EU-OC	rs2477707	1	2420917	PLCH2	173	0
PY-WA vs. EU-OC	rs284233	1	10699847	na	306	0
PY-WA vs. EU-OC	rs6704113	1	10975688	na	108	0
PY-WA vs. EU-OC	rs355021	1	13780376	na	255	0
PY-WA vs. EU-OC	rs355022	1	13781277	PDPN	165	0
PY-WA vs. EU-OC	rs1341306	1	18437256	IGSF21	532	0
PY-WA vs. EU-OC	rs16824489	1	20894989	KIF17	574	0
PY-WA vs. EU-OC	rs2282718	1	25113643	RUNX3	13	0
PY-WA vs. EU-OC	rs4390216	1	46039043	LOC440587	34	0
PY-WA vs. EU-OC	rs6429580	1	46048235	MAST2	45	0
PY-WA vs. EU-OC	rs11211200	1	46060939	MAST2	42	0
PY-WA vs. EU-OC	rs4298677	1	46079206	MAST2	33	0
PY-WA vs. EU-OC	rs11211204	1	46090451	MAST2	29	0
PY-WA vs. EU-OC	rs4660318	1	46107463	MAST2	29	0
PY-WA vs. EU-OC	rs1553390	1	47265380	CYP4X1	209	0
PY-WA vs. EU-OC	rs12041262	1	47269570	CYP4X1	94	0
PY-WA vs. EU-OC	rs682896	1	66958650	SGIP1	90	0
PY-WA vs. EU-OC	rs504169	1	66995285	TCTEX1D1	40	0
PY-WA vs. EU-OC	rs11163183	1	81250625	na	975	0
PY-WA vs. EU-OC	rs11163391	1	82090077	LPHN2	79	0
PY-WA vs. EU-OC	rs2968485	1	96642521	na	96	0
PY-WA vs. EU-OC	rs3119186	1	100554125	na	931	0
PY-WA vs. EU-OC	rs1891737	1	163195377	na	67	0
PY-WA vs. EU-OC	rs10800183	1	164321270	FAM78B	256	0
PY-WA vs. EU-OC	rs4147071	1	164365585	FAM78B	1	0
PY-WA vs. EU-OC	rs2586394	1	170523452	DNM3	90	0
PY-WA vs. EU-OC	rs6425021	1	184401859	HMCN1	6	0
PY-WA vs. EU-OC	rs4348778	1	200962870	JARID1B	180	0
PY-WA vs. EU-OC	rs872129	1	201436014	na	210	0
PY-WA vs. EU-OC	rs10900437	1	203285849	CNTN2	50	0
PY-WA vs. EU-OC	rs10793722	1	203286003	CNTN2	59	0
PY-WA vs. EU-OC	rs4951161	1	203287189	CNTN2	45	0
PY-WA vs. EU-OC	rs12565659	1	207013534	na	225	0
PY-WA vs. EU-OC	rs6429226	1	239082389	RGS7	209	0
PY-WA vs. EU-OC	rs10802305	1	244208873	SMYD3	150	0
PY-WA vs. EU-OC	rs2551214	2	2335000	na	42	0
PY-WA vs. EU-OC	rs1349454	2	2644301	na	42	0
PY-WA vs. EU-OC	rs13393547	2	5099109	na	372	0
PY-WA vs. EU-OC	rs6714934	2	5112500	na	488	0
PY-WA vs. EU-OC	rs6730450	2	15240028	NAG	91	0
PY-WA vs. EU-OC	rs4668882	2	15251702	NAG	723	0
PY-WA vs. EU-OC	rs13010109	2	15256937	NAG	109	0
PY-WA vs. EU-OC	rs733555	2	16327708	na	42	0
PY-WA vs. EU-OC	rs7570727	2	18235432	na	174	0
PY-WA vs. EU-OC	rs1516919	2	18360929	na	100	0
PY-WA vs. EU-OC	rs1147116	2	20099811	LAPTM4A	39	0
PY-WA vs. EU-OC	rs6745226	2	26347101	HADHB	576	0
PY-WA vs. EU-OC	rs4666086	2	28609759	PLB1	147	0
PY-WA vs. EU-OC	rs4670519	2	35923537	na	282	0
PY-WA vs. EU-OC	rs1489153	2	36208796	na	13	0
PY-WA vs. EU-OC	rs305175	2	36217668	na	56	0
PY-WA vs. EU-OC	rs11124737	2	40324911	SLC8A1	323	0
PY-WA vs. EU-OC	rs842639	2	60948749	na	15	0
PY-WA vs. EU-OC	rs6713620	2	62465549	na	156	0
PY-WA vs. EU-OC	rs7600002	2	64366711	na	242	0
PY-WA vs. EU-OC	rs12476837	2	76189582	na	437	0
PY-WA vs. EU-OC	rs10196177	2	76939260	na	182	0
PY-WA vs. EU-OC	rs10496347	2	100431642	na	75	0
PY-WA vs. EU-OC	rs1597147	2	112094029	na	19	0
PY-WA vs. EU-OC	rs12711788	2	114250088	na	216	0
PY-WA vs. EU-OC	rs12623934	2	120877872	na	778	0
PY-WA vs. EU-OC	rs7589808	2	126230018	na	49	0
PY-WA vs. EU-OC	rs9973474	2	126274278	na	122	0
PY-WA vs. EU-OC	rs4972235	2	126287069	na	60	0
PY-WA vs. EU-OC	rs1531078	2	126394427	na	41	0
PY-WA vs. EU-OC	rs7608516	2	128162347	na	9	0
PY-WA vs. EU-OC	rs7575478	2	128178026	WDR33,SFT2D3	49	0
PY-WA vs. EU-OC	rs598786	2	140771550	LRP1B	12	0
PY-WA vs. EU-OC	rs787146	2	144388612	na	109	0
PY-WA vs. EU-OC	rs12479440	2	147240522	na	432	0
PY-WA vs. EU-OC	rs10928399	2	148994366	na	101	33
PY-WA vs. EU-OC	rs4499362	2	149284866	na	5	0
PY-WA vs. EU-OC	rs6433777	2	152583990	CACNB4	69	0
PY-WA vs. EU-OC	rs12476567	2	162856657	IFIH1	288	0
PY-WA vs. EU-OC	rs10439256	2	162860597	IFIH1	277	0
PY-WA vs. EU-OC	rs6755666	2	163711620	na	56	0
PY-WA vs. EU-OC	rs7584977	2	173040971	ITGA6	107	0
PY-WA vs. EU-OC	rs10207436	2	179002857	PRKRA	30	0
PY-WA vs. EU-OC	rs2288322	2	179031363	na	7	0
PY-WA vs. EU-OC	rs888182	2	217280090	na	553	0
PY-WA vs. EU-OC	rs16856529	2	217281937	na	250	0
PY-WA vs. EU-OC	rs4356648	2	233658509	INPP5D	130	0
PY-WA vs. EU-OC	rs1860700	2	234704294	na	978	0
PY-WA vs. EU-OC	rs11674746	2	241784375	TMEM16G	91	0
PY-WA vs. EU-OC	rs4675971	2	241845846	HDLBP	741	0
PY-WA vs. EU-OC	rs1984598	2	241933497	2010-09-02	402	0
PY-WA vs. EU-OC	rs4675925	2	242170813	THAP4	116	0
PY-WA vs. EU-OC	rs1682914	3	3819751	LOC728221,LRRN1	310	0
PY-WA vs. EU-OC	rs7639618	3	15191433	LOC344875,LOC731643	257	0
PY-WA vs. EU-OC	rs9864422	3	15202256	LOC731643	153	0
PY-WA vs. EU-OC	rs9880567	3	22351898	na	12	0
PY-WA vs. EU-OC	rs9848727	3	52045995	na	225	0
PY-WA vs. EU-OC	rs9851576	3	52066294	na	277	0
PY-WA vs. EU-OC	rs4687810	3	52144135	WDR51A	263	0
PY-WA vs. EU-OC	rs1443936	3	59222205	na	568	0
PY-WA vs. EU-OC	rs9838807	3	107378042	na	152	0
PY-WA vs. EU-OC	rs12489296	3	107407966	na	178	0
PY-WA vs. EU-OC	rs13085623	3	107415425	na	201	0
PY-WA vs. EU-OC	rs10934275	3	115661169	ZBTB20	52	0
PY-WA vs. EU-OC	rs1606871	3	121573135	na	30	0
PY-WA vs. EU-OC	rs848145	3	124819672	MYLK	252	0
PY-WA vs. EU-OC	rs756037	3	125460767	KALRN	117	0
PY-WA vs. EU-OC	rs10936625	3	171577602	SKIL	143	0
PY-WA vs. EU-OC	rs1583919	3	179559031	na	98	0
PY-WA vs. EU-OC	rs9884834	4	92571	ZNF718	1	0
PY-WA vs. EU-OC	rs4689620	4	7216316	na	23	0
PY-WA vs. EU-OC	rs158278	4	16410139	LDB2	113	0
PY-WA vs. EU-OC	rs4552442	4	25815036	na	75	0
PY-WA vs. EU-OC	rs3113584	4	32915308	LOC133185	107	0
PY-WA vs. EU-OC	rs2687466	4	32940629	na	107	0
PY-WA vs. EU-OC	rs883617	4	32994477	na	42	0
PY-WA vs. EU-OC	rs2585942	4	33000247	na	48	0
PY-WA vs. EU-OC	rs4293771	4	33037607	na	42	0
PY-WA vs. EU-OC	rs10004371	4	33039662	na	37	0
PY-WA vs. EU-OC	rs7657687	4	33082728	na	292	0
PY-WA vs. EU-OC	rs6827883	4	33120802	na	286	0
PY-WA vs. EU-OC	rs11725412	4	37954149	na	55	0
PY-WA vs. EU-OC	rs1563889	4	43571228	na	15	0
PY-WA vs. EU-OC	rs218269	4	55105896	na	287	0
PY-WA vs. EU-OC	rs2702340	4	56602951	na	570	0
PY-WA vs. EU-OC	rs12504448	4	74588270	AFM	99	0
PY-WA vs. EU-OC	rs3756073	4	74632453	na	174	0
PY-WA vs. EU-OC	rs4693349	4	95012346	na	119	0
PY-WA vs. EU-OC	rs7668831	4	131819744	na	43	0
PY-WA vs. EU-OC	rs6844989	4	151401705	na	148	0
PY-WA vs. EU-OC	rs750068	4	156465091	na	283	0
PY-WA vs. EU-OC	rs1350674	4	156506041	MAP9	267	0
PY-WA vs. EU-OC	rs2100696	4	183169070	na	140	0
PY-WA vs. EU-OC	rs11132125	4	183591553	ODZ3	358	379
PY-WA vs. EU-OC	rs12659954	5	28689261	na	224	0
PY-WA vs. EU-OC	rs1862556	5	28713880	na	249	0
PY-WA vs. EU-OC	rs283122	5	32129320	PDZD2	366	0
PY-WA vs. EU-OC	rs4502833	5	44134522	na	6	0
PY-WA vs. EU-OC	rs1550939	5	44257469	na	1	0
PY-WA vs. EU-OC	rs4643965	5	44260565	na	88	0
PY-WA vs. EU-OC	rs2053784	5	44277240	na	76	0
PY-WA vs. EU-OC	rs875988	5	53886960	na	94	0
PY-WA vs. EU-OC	rs37537	5	57649779	na	133	0
PY-WA vs. EU-OC	rs905199	5	57734051	na	509	0
PY-WA vs. EU-OC	rs2112956	5	58556492	PDE4D	201	0
PY-WA vs. EU-OC	rs789396	5	59770526	na	40	15
PY-WA vs. EU-OC	rs2372048	5	66882501	na	189	0
PY-WA vs. EU-OC	rs4293869	5	66890196	na	241	0
PY-WA vs. EU-OC	rs2941878	5	90515185	na	36	0
PY-WA vs. EU-OC	rs1199746	5	123810501	na	22	0
PY-WA vs. EU-OC	rs10515588	5	146999307	JAKMIP2	133	0
PY-WA vs. EU-OC	rs4382156	5	147001993	JAKMIP2	123	0
PY-WA vs. EU-OC	rs3097775	5	150913604	FAT2	868	0
PY-WA vs. EU-OC	rs299287	5	162825997	HMMR	61	0
PY-WA vs. EU-OC	rs9328432	6	7590170	na	143	0
PY-WA vs. EU-OC	rs9392168	6	7594848	na	181	0
PY-WA vs. EU-OC	rs2073519	6	16431371	ATXN1	124	0
PY-WA vs. EU-OC	rs7756521	6	30956232	na	38	0
PY-WA vs. EU-OC	rs3873334	6	31004126	na	112	0
PY-WA vs. EU-OC	rs6915627	6	35236308	na	24	0
PY-WA vs. EU-OC	rs9394438	6	37640081	na	182	0
PY-WA vs. EU-OC	rs804843	6	37653901	na	1	0
PY-WA vs. EU-OC	rs6458004	6	37670681	na	90	0
PY-WA vs. EU-OC	rs4714084	6	37693199	na	117	0
PY-WA vs. EU-OC	rs2396578	6	46006032	CLIC5	550	0
PY-WA vs. EU-OC	rs10944288	6	87708461	HTR1E,LOC643962	30	0
PY-WA vs. EU-OC	rs1506084	6	100919909	na	85	0
PY-WA vs. EU-OC	rs241816	6	100986372	SIM1	37	0
PY-WA vs. EU-OC	rs6911049	6	104445077	na	258	0
PY-WA vs. EU-OC	rs2110902	6	107680263	PDSS2	33	0
PY-WA vs. EU-OC	rs1771736	6	119173742	na	345	0
PY-WA vs. EU-OC	rs265371	6	129642216	LAMA2	81	0
PY-WA vs. EU-OC	rs703193	6	136651043	BCLAF1	17	0
PY-WA vs. EU-OC	rs6570078	6	136670412	na	73	0
PY-WA vs. EU-OC	rs746973	6	136903268	MAP7	70	0
PY-WA vs. EU-OC	rs3799472	6	136910622	MAP7	46	0
PY-WA vs. EU-OC	rs2327742	6	136925861	MAP3K5	72	0
PY-WA vs. EU-OC	rs2327743	6	136950935	MAP3K5	47	0
PY-WA vs. EU-OC	rs760862	6	136951357	MAP3K5	85	0
PY-WA vs. EU-OC	rs9376382	6	139247079	C6orf91	307	0
PY-WA vs. EU-OC	rs10782344	6	156820352	na	231	0
PY-WA vs. EU-OC	rs294898	6	159592927	FNDC1	241	0
PY-WA vs. EU-OC	rs9355736	6	159851095	na	55	0
PY-WA vs. EU-OC	rs9457743	6	160193689	na	156	0
PY-WA vs. EU-OC	rs6930229	6	160203429	na	185	0
PY-WA vs. EU-OC	rs4392700	6	162644237	PARK2	887	0
PY-WA vs. EU-OC	rs4709620	6	162808694	PARK2	243	0
PY-WA vs. EU-OC	rs6938236	6	168637907	SMOC2	238	0
PY-WA vs. EU-OC	rs6955585	7	7775667	na	208	0
PY-WA vs. EU-OC	rs10230521	7	17616729	na	39	0
PY-WA vs. EU-OC	rs10251847	7	17618082	na	29	0
PY-WA vs. EU-OC	rs6950869	7	17619440	na	49	0
PY-WA vs. EU-OC	rs763290	7	21717467	DNAH11	529	0
PY-WA vs. EU-OC	rs10243058	7	33777807	na	111	0
PY-WA vs. EU-OC	rs4723331	7	33778454	na	256	0
PY-WA vs. EU-OC	rs1362927	7	33783234	na	245	0
PY-WA vs. EU-OC	rs323166	7	78174029	MAGI2	588	0
PY-WA vs. EU-OC	rs10242995	7	85864462	na	110	0
PY-WA vs. EU-OC	rs7809389	7	97110992	na	158	0
PY-WA vs. EU-OC	rs3808050	7	102901332	RELN	85	0
PY-WA vs. EU-OC	rs10248924	7	138482247	TTC26	146	0
PY-WA vs. EU-OC	rs10268763	7	138492344	TTC26	133	0
PY-WA vs. EU-OC	rs6955929	7	138517999	TTC26	148	0
PY-WA vs. EU-OC	rs955166	7	152487622	na	686	0
PY-WA vs. EU-OC	rs10246957	7	155143752	RBM33	62	0
PY-WA vs. EU-OC	rs10155959	7	155187044	RBM33	78	0
PY-WA vs. EU-OC	rs13222019	7	155239002	RBM33	88	0
PY-WA vs. EU-OC	rs1920449	7	155240619	RBM33	92	0
PY-WA vs. EU-OC	rs2028742	8	3069925	CSMD1	211	0
PY-WA vs. EU-OC	rs11775769	8	10509878	RP1L1	97	0
PY-WA vs. EU-OC	rs6586870	8	19754055	INTS10	31	0
PY-WA vs. EU-OC	rs2355641	8	41828227	LOC727725	127	0
PY-WA vs. EU-OC	rs1431594	8	64497303	na	64	0
PY-WA vs. EU-OC	rs4737206	8	66292544	na	54	0
PY-WA vs. EU-OC	rs962695	8	80818761	na	325	0
PY-WA vs. EU-OC	rs6989866	8	89442152	na	5	0
PY-WA vs. EU-OC	rs1834716	8	126028944	na	260	0
PY-WA vs. EU-OC	rs2725879	8	126033686	na	193	0
PY-WA vs. EU-OC	rs10090062	8	127744348	na	472	0
PY-WA vs. EU-OC	rs3780047	8	140731993	KCNK9	201	0
PY-WA vs. EU-OC	rs13252791	8	142662768	na	34	0
PY-WA vs. EU-OC	rs2717591	8	143900465	na	63	0
PY-WA vs. EU-OC	rs4873809	8	144765210	TSTA3	161	0
PY-WA vs. EU-OC	rs10965206	9	219826	na	56	0
PY-WA vs. EU-OC	rs4740650	9	1788737	na	70	0
PY-WA vs. EU-OC	rs4741719	9	2496794	na	1	0
PY-WA vs. EU-OC	rs7873419	9	3192370	na	57	0
PY-WA vs. EU-OC	rs12340274	9	3490471	RFX3	147	0
PY-WA vs. EU-OC	rs10739056	9	4374289	na	81	0
PY-WA vs. EU-OC	rs7020418	9	5598427	na	141	0
PY-WA vs. EU-OC	rs4740988	9	9773693	na	77	0
PY-WA vs. EU-OC	rs2382056	9	9775685	na	43	0
PY-WA vs. EU-OC	rs1174590	9	9780222	na	64	0
PY-WA vs. EU-OC	rs2821487	9	9783342	na	443	0
PY-WA vs. EU-OC	rs1325149	9	12560945	na	74	0
PY-WA vs. EU-OC	rs10738284	9	12563829	na	74	0
PY-WA vs. EU-OC	rs1408801	9	12662320	na	152	0
PY-WA vs. EU-OC	rs10809828	9	12697861	TYRP1	143	0
PY-WA vs. EU-OC	rs617572	9	12820070	na	65	0
PY-WA vs. EU-OC	rs10123240	9	13582808	na	118	0
PY-WA vs. EU-OC	rs7874668	9	14035745	na	67	0
PY-WA vs. EU-OC	rs7849437	9	19847154	na	175	0
PY-WA vs. EU-OC	rs10757124	9	20165604	na	30	0
PY-WA vs. EU-OC	rs1653081	9	23780800	ELAVL2	235	0
PY-WA vs. EU-OC	rs1219937	9	25891396	na	288	0
PY-WA vs. EU-OC	rs10812467	9	26800177	na	560	0
PY-WA vs. EU-OC	rs1904128	9	31402378	na	55	0
PY-WA vs. EU-OC	rs1976016	9	31436951	na	31	0
PY-WA vs. EU-OC	rs2502170	9	31450231	na	118	0
PY-WA vs. EU-OC	rs2481564	9	31451683	na	56	0
PY-WA vs. EU-OC	rs10813616	9	31540664	na	105	0
PY-WA vs. EU-OC	rs7041770	9	35523348	RUSC2	119	0
PY-WA vs. EU-OC	rs7045243	9	86024539	na	99	0
PY-WA vs. EU-OC	rs4466476	9	86026679	na	134	0
PY-WA vs. EU-OC	rs329200	9	86985046	na	67	0
PY-WA vs. EU-OC	rs296620	9	92901741	na	42	0
PY-WA vs. EU-OC	rs10760729	9	102411797	na	22	0
PY-WA vs. EU-OC	rs1492601	9	104679442	na	195	0
PY-WA vs. EU-OC	rs10820298	9	104685413	na	105	0
PY-WA vs. EU-OC	rs4979136	9	109400704	na	44	0
PY-WA vs. EU-OC	rs2900556	9	114477405	na	90	0
PY-WA vs. EU-OC	rs1359679	9	120637435	na	116	0
PY-WA vs. EU-OC	rs945249	9	121882081	na	233	226
PY-WA vs. EU-OC	rs10818831	9	125352612	DENND1A	313	0
PY-WA vs. EU-OC	rs2431628	10	12900397	CAMK1D	88	0
PY-WA vs. EU-OC	rs9651540	10	13750169	FRMD4A	323	0
PY-WA vs. EU-OC	rs364974	10	17386272	na	103	0
PY-WA vs. EU-OC	rs543850	10	25670930	GPR158	120	0
PY-WA vs. EU-OC	rs7086311	10	27432015	na	26	0
PY-WA vs. EU-OC	rs4747589	10	27530232	ACBD5	20	0
PY-WA vs. EU-OC	rs7911012	10	29316922	na	89	0
PY-WA vs. EU-OC	rs2244131	10	43594736	na	6	0
PY-WA vs. EU-OC	rs1147963	10	44292854	na	2	0
PY-WA vs. EU-OC	rs2245147	10	49881176	na	99	0
PY-WA vs. EU-OC	rs2264844	10	49882992	na	97	0
PY-WA vs. EU-OC	rs7099450	10	51867853	SGMS1	1	0
PY-WA vs. EU-OC	rs1106789	10	87543389	GRID1	145	0
PY-WA vs. EU-OC	rs7071693	10	87575469	GRID1	74	0
PY-WA vs. EU-OC	rs11818522	10	87596597	GRID1	85	0
PY-WA vs. EU-OC	rs1234212	10	89598872	na	131	0
PY-WA vs. EU-OC	rs12265484	10	91574555	na	158	0
PY-WA vs. EU-OC	rs7895851	10	91577381	na	211	0
PY-WA vs. EU-OC	rs7895863	10	91577409	na	153	0
PY-WA vs. EU-OC	rs1860404	10	119009167	SLC18A2	315	0
PY-WA vs. EU-OC	rs181662	10	119372445	na	704	0
PY-WA vs. EU-OC	rs2162541	10	123158081	na	263	0
PY-WA vs. EU-OC	rs231361	11	2648076	KCNQ1	128	0
PY-WA vs. EU-OC	rs231359	11	2651182	KCNQ1	118	0
PY-WA vs. EU-OC	rs7107057	11	18528736	UEVLD	59	0
PY-WA vs. EU-OC	rs7938558	11	21106208	NELL1	621	0
PY-WA vs. EU-OC	rs7104512	11	31725460	ELP4	140	0
PY-WA vs. EU-OC	rs1467459	11	32199282	na	227	0
PY-WA vs. EU-OC	rs3858451	11	32423225	na	239	0
PY-WA vs. EU-OC	rs3750997	11	70836489	DHCR7	30	0
PY-WA vs. EU-OC	rs12800438	11	70848651	NADSYN1	53	0
PY-WA vs. EU-OC	rs10793030	11	71849745	na	26	0
PY-WA vs. EU-OC	rs4269941	11	86162228	na	129	0
PY-WA vs. EU-OC	rs4128368	11	86168018	na	135	0
PY-WA vs. EU-OC	rs12807746	11	87742829	na	90	0
PY-WA vs. EU-OC	rs982010	11	88004946	GRM5	218	191
PY-WA vs. EU-OC	rs1995493	11	88005956	GRM5	779	775
PY-WA vs. EU-OC	rs11020772	11	88018980	GRM5	211	0
PY-WA vs. EU-OC	rs568629	11	91947327	FAT3	80	0
PY-WA vs. EU-OC	rs7948432	11	101401769	na	45	0
PY-WA vs. EU-OC	rs11215306	11	114370421	na	140	0
PY-WA vs. EU-OC	rs12419473	11	114390363	na	102	0
PY-WA vs. EU-OC	rs1503415	11	120991762	SORL1	28	0
PY-WA vs. EU-OC	rs1893186	11	124615799	na	270	0
PY-WA vs. EU-OC	rs2072449	12	8101904	C3AR1	92	0
PY-WA vs. EU-OC	rs10492348	12	10739067	na	292	0
PY-WA vs. EU-OC	rs7312219	12	18953144	na	2	0
PY-WA vs. EU-OC	rs2200507	12	24835636	na	304	0
PY-WA vs. EU-OC	rs2653764	12	37284897	na	104	0
PY-WA vs. EU-OC	rs180429	12	45464205	SLC38A4	350	0
PY-WA vs. EU-OC	rs4759058	12	52625319	HOXC13	14	0
PY-WA vs. EU-OC	rs4261347	12	79839456	LIN7A	188	0
PY-WA vs. EU-OC	rs12582135	12	92599827	CRADD	314	304
PY-WA vs. EU-OC	rs2060546	12	94739587	na	99	0
PY-WA vs. EU-OC	rs4272832	12	100923485	na	61	0
PY-WA vs. EU-OC	rs10860831	12	100933677	CCDC53	48	0
PY-WA vs. EU-OC	rs11111153	12	101000217	NUP37	44	0
PY-WA vs. EU-OC	rs10083092	12	101002824	NUP37	48	0
PY-WA vs. EU-OC	rs11111187	12	101081329	C12orf48	19	0
PY-WA vs. EU-OC	rs903248	12	103629657	CHST11	1	0
PY-WA vs. EU-OC	rs473640	12	116250097	NOS1	140	0
PY-WA vs. EU-OC	rs2461507	12	119568652	CABP1	128	0
PY-WA vs. EU-OC	rs1108602	13	24537070	na	957	0
PY-WA vs. EU-OC	rs2312982	13	30579265	na	142	0
PY-WA vs. EU-OC	rs1158807	13	33292716	RFC3	267	0
PY-WA vs. EU-OC	rs3135629	13	33307603	RFC3	271	248
PY-WA vs. EU-OC	rs11620516	13	41483714	na	38	0
PY-WA vs. EU-OC	rs3012857	13	57624798	na	197	0
PY-WA vs. EU-OC	rs7989612	13	67300145	na	378	0
PY-WA vs. EU-OC	rs1334195	13	87994757	na	28	0
PY-WA vs. EU-OC	rs2347542	13	88003602	na	31	0
PY-WA vs. EU-OC	rs8001794	13	90472154	na	76	0
PY-WA vs. EU-OC	rs1924077	13	94107707	na	445	0
PY-WA vs. EU-OC	rs7328053	13	108099789	MYO16	89	0
PY-WA vs. EU-OC	rs1926533	13	108100865	MYO16	103	0
PY-WA vs. EU-OC	rs179724	14	30553512	STRN3	358	0
PY-WA vs. EU-OC	rs7148846	14	39203572	na	179	0
PY-WA vs. EU-OC	rs17120651	14	48385077	na	417	0
PY-WA vs. EU-OC	rs311848	14	58270833	na	99	0
PY-WA vs. EU-OC	rs311847	14	58272282	na	67	0
PY-WA vs. EU-OC	rs7161189	14	58479253	na	186	0
PY-WA vs. EU-OC	rs1256531	14	64817512	na	180	0
PY-WA vs. EU-OC	rs2854439	15	43146138	SORD	51	0
PY-WA vs. EU-OC	rs491115	15	45971609	na	433	0
PY-WA vs. EU-OC	rs530219	15	45979499	na	317	0
PY-WA vs. EU-OC	rs341392	15	58911527	RORA	707	0
PY-WA vs. EU-OC	rs904864	15	67205778	na	554	0
PY-WA vs. EU-OC	rs2899826	15	72521553	na	63	56
PY-WA vs. EU-OC	rs7166701	15	72536068	UBL7	101	0
PY-WA vs. EU-OC	rs8028430	15	72632798	ARID3B	99	0
PY-WA vs. EU-OC	rs9635320	15	72672144	ARID3B	69	0
PY-WA vs. EU-OC	rs11072494	15	72676216	ARID3B	71	0
PY-WA vs. EU-OC	rs11072495	15	72678184	na	99	0
PY-WA vs. EU-OC	rs6495117	15	72686553	CLK3	76	0
PY-WA vs. EU-OC	rs938682	15	76683602	CHRNA3	1	0
PY-WA vs. EU-OC	rs1865360	15	77296479	LOC729911	340	0
PY-WA vs. EU-OC	rs7175096	15	90231631	SLCO3A1	170	0
PY-WA vs. EU-OC	rs12441450	15	99226990	na	475	0
PY-WA vs. EU-OC	rs8038607	15	99332152	LRRK1	140	0
PY-WA vs. EU-OC	rs11861975	16	1656295	CRAMP1L	374	0
PY-WA vs. EU-OC	rs8063431	16	1744358	MAPK8IP3	35	0
PY-WA vs. EU-OC	rs740862	16	3629679	LOC729791	23	0
PY-WA vs. EU-OC	rs2290829	16	22203987	EEF2K	621	0
PY-WA vs. EU-OC	rs4479245	16	31511273	na	15	0
PY-WA vs. EU-OC	rs10521177	16	47334074	na	164	0
PY-WA vs. EU-OC	rs10521178	16	47381192	na	182	0
PY-WA vs. EU-OC	rs8062570	16	49414343	na	84	0
PY-WA vs. EU-OC	rs5005161	16	52256177	RPGRIP1L	94	0
PY-WA vs. EU-OC	rs6499714	16	53268398	na	36	0
PY-WA vs. EU-OC	rs4783864	16	53626900	na	358	0
PY-WA vs. EU-OC	rs4458015	16	60852036	na	42	0
PY-WA vs. EU-OC	rs7203264	16	67682470	na	28	0
PY-WA vs. EU-OC	rs1127231	16	67912464	VPS4A	43	0
PY-WA vs. EU-OC	rs8044972	16	75957583	ADAMTS18	59	0
PY-WA vs. EU-OC	rs2115418	16	75963175	ADAMTS18	34	0
PY-WA vs. EU-OC	rs1549666	16	75966476	ADAMTS18	28	0
PY-WA vs. EU-OC	rs6539986	16	85526711	na	313	0
PY-WA vs. EU-OC	rs1805453	17	5326122	DERL2	17	0
PY-WA vs. EU-OC	rs9901132	17	5337421	na	13	0
PY-WA vs. EU-OC	rs3803800	17	7403693	TNFSF12-TNFSF13,TNFSF13	468	0
PY-WA vs. EU-OC	rs4404112	17	16789645	TNFRSF13B	4	0
PY-WA vs. EU-OC	rs4629023	17	16921516	M-RIP	104	92
PY-WA vs. EU-OC	rs4074819	17	16967980	M-RIP	99	94
PY-WA vs. EU-OC	rs3744127	17	17024727	M-RIP	140	132
[truncated: 6,965 more rows]
