# Supplementary material for: Parallel Adaptive Divergence among Geographically Diverse Human Populations
Source: PLoS Genet. 2011 Jun 16;7(6):e1002127. doi: 10.1371/journal.pgen.1002127 (PMC3116918; doi:10.1371/journal.pgen.1002127)
Supplement: Table S4 — Results from nine coalescent simulation models representing various demographic scenarios. (PDF) [file pgen.1002127.s007.pdf]

**Table S4**

Results from nine coalescent simulation models representing various demographic scenarios.

| <b>Model</b>           | <b>Description<sup>a</sup></b>                                                                                                    | <b>Mean Parallel Divergent SNPs (95% CI)<sup>b</sup></b> | <b>Mean Skew (95% CI)<sup>c</sup></b> | <b>Divergence Comparison with Highest Parallel Divergence (DCHPD)<sup>d</sup></b> | <b>Parallel Divergent SNPs of DCHPD (95% CI)<sup>e</sup></b> | <b>Most Skewed Divergence Comparison (MSDC)<sup>f</sup></b> | <b>Skew of MSDC (95% CI)<sup>g</sup></b> |
|------------------------|-----------------------------------------------------------------------------------------------------------------------------------|----------------------------------------------------------|---------------------------------------|-----------------------------------------------------------------------------------|--------------------------------------------------------------|-------------------------------------------------------------|------------------------------------------|
| <i>standard</i>        | cosi-based parameters. WA and PY follow Africa; EU follows Europe; EA, OC, SA follow Asia. Bottlenecks but $N > 500$ at all times | 67.2 (62.2,71.3)                                         | 0.54 (0.52,0.56)                      | PY-WA vs. EU-EA                                                                   | 68.6 (56.7,82.7)                                             | PY-WA vs. OC-EA                                             | 0.55 (0.51,0.64)                         |
| <i>3nobottle</i>       | <i>standard</i> but no bottlenecks for out-of-Africa or for PY, OC, or SA                                                         | 67.6 (62.8,71.2)                                         | 0.54 (0.53,0.57)                      | WA-OC vs. EA-SA                                                                   | 68.5 (56.8,79.8)                                             | PY-WA vs. EU-SA                                             | 0.55 (0.50,0.62)                         |
| <i>OC-EAmig1</i>       | <i>standard</i> but gene flow from EA to OC, $4N_m = 1$                                                                           | 67.2 (63.1,72.3)                                         | 0.54 (0.53,0.57)                      | PY-WA vs. EU-OC                                                                   | 69.0 (56.1,82.9)                                             | PY-OC vs. EA-SA                                             | 0.55 (0.50,0.65)                         |
| <i>OC-EAmig10</i>      | <i>standard</i> but gene flow from EA to OC, $4N_m = 10$                                                                          | 67.0 (62.6,72.4)                                         | 0.55 (0.53,0.57)                      | PY-WA vs. EU-EA                                                                   | 69.1 (55.7,80.3)                                             | WA-OC vs. EA-SA                                             | 0.56 (0.50,0.63)                         |
| <i>OC-EAmig100</i>     | <i>standard</i> but gene flow from EA to OC, $4N_m = 100$                                                                         | 77.7 (74.1,81.7)                                         | 0.60 (0.59,0.62)                      | EU-OC vs. EA-SA                                                                   | 91.7 (77.3,104.3)                                            | EU-OC vs. EA-SA                                             | 0.83 (0.77,0.90)                         |
| <i>constantlow</i>     | <i>standard</i> but no bottlenecks or population growth, constant $N = 10,000$                                                    | 74.1 (69.9,78.1)                                         | 0.53 (0.52,0.55)                      | PY-WA vs. OC-SA                                                                   | 78.0 (66.1,88.2)                                             | EU-OC vs. EA-SA                                             | 0.55 (0.50,0.64)                         |
| <i>nobottle</i>        | <i>standard</i> but no bottlenecks                                                                                                | 67.6 (63.8,71.2)                                         | 0.53 (0.52,0.55)                      | PY-EU vs. SA-EA                                                                   | 68.4 (58.6,79.4)                                             | PY-EU vs. SA-OC                                             | 0.54 (0.50,0.60)                         |
| <i>3tighterbottle</i>  | <i>standard</i> but tighter bottlenecks for PY, OC, and SA ( $N = 350$ for 50 generations)                                        | 70.6 (66.7,73.6)                                         | 0.54 (0.52,0.56)                      | PY-EU vs. OC-SA                                                                   | 72.9 (64.4,84.3)                                             | PY-EU vs. EA-SA                                             | 0.55 (0.50,0.63)                         |
| <i>3tightestbottle</i> | <i>standard</i> but even tighter bottlenecks for PY, OC, and SA ( $N = 150$ for 50 generations)                                   | 77.5 (72.5,81.5)                                         | 0.57 (0.55,0.59)                      | PY-EU vs. OC-SA                                                                   | 90.4 (79.3,101.5)                                            | PY-EU vs. EA-SA                                             | 0.64 (0.58,0.72)                         |

<sup>a</sup>Brief description of each model. All models join populations in the same order, SA-EA-OC-EU-WA-PY, at the same time points. Parameters follow the cosi model calibrated with HapMap data unless otherwise indicated. All bottlenecks last for 50 generations.

<sup>b</sup>Mean number of parallel divergent SNPs across all divergence comparisons, with 95% confidence intervals.

<sup>c</sup>Mean proportion of parallel divergent SNPs showing the major orientation across all divergence comparisons, with 95% confidence intervals.

<sup>d</sup>Divergence comparison (out of 15) showing the highest number of parallel divergent SNPs

<sup>e</sup>Mean number of parallel divergent SNPs for the divergence comparison identified in the previous column, with 95% confidence intervals.

<sup>f</sup>Divergence comparison (out of 15) showing the highest major orientation frequency.

<sup>g</sup>The proportion of parallel divergent SNPs showing the major orientation for the divergence comparison identified in the previous column, with 95% confidence intervals.
